# Supplementary material
Source: PubMed Central journal article supplement (PMC1950334)
Supplement: NIHMS15618-supplement-02.pdf [file NIHMS15618-supplement-02.pdf]

Table S-6. Chemosensory genes identified by 7TM/PFAM/C.elegans search method.

| Gene Number | TMDs | Introns | C_elegans   | eval  | locus   |
|-------------|------|---------|-------------|-------|---------|
| SPU_000030  | 7    | 0       | F16D3.7     | 2e-04 | na      |
| SPU_000064  | 6    | 1       | Y40H4A.1b   | 5e-15 | gar-3   |
| SPU_000078  | 7    | 0       | C09B7.1c    | 3e-10 | ser-7   |
| SPU_000079  | 7    | 0       | C09B7.1c    | 3e-10 | ser-7   |
| SPU_000085  | 5    | 2       | K02F2.6     | 6e-09 | ser-3   |
| SPU_000368  | 7    | 0       | C09B7.1c    | 2e-08 | ser-7   |
| SPU_000369  | 7    | 0       | K09G1.4a    | 2e-08 | dop-2   |
| SPU_000370  | 7    | 0       | C02D4.2e    | 6e-11 | ser-2   |
| SPU_000374  | 6    | 0       | W05B5.2     | 9e-16 | na      |
| SPU_000413  | 7    | 0       | F14D12.6b   | 8e-08 | tag-24  |
| SPU_000448  | 7    | 5       | C09B7.1c    | 6e-08 | ser-7   |
| SPU_000462  | 7    | 0       | Y54G2A.35   | 2e-11 | na      |
| SPU_000530  | 7    | 0       | Y59H11AL.1b | 8e-14 | na      |
| SPU_000576  | 7    | 0       | AC7.1b      | 3e-19 | tag-49  |
| SPU_000605  | 7    | 1       | C25G6.5     | 3e-07 | na      |
| SPU_000703  | 7    | 0       | C02D4.2e    | 1e-10 | ser-2   |
| SPU_000719  | 7    | 0       | C10C6.2     | 1e-16 | npr-3   |
| SPU_000720  | 7    | 0       | ZK455.3     | 7e-20 | na      |
| SPU_000905  | 7    | 0       | C53C7.1b    | 5e-11 | na      |
| SPU_000913  | 7    | 0       | C30F12.6    | 1e-12 | na      |
| SPU_000968  | 7    | 1       | Y40H4A.1a   | 3e-20 | gar-3   |
| SPU_001020  | 7    | 0       | K09G1.4b    | 2e-10 | dop-2   |
| SPU_001050  | 7    | 0       | F59C12.2b   | 2e-06 | ser-1   |
| SPU_001051  | 7    | 0       | T23B3.4     | 3e-07 | na      |
| SPU_001162  | 6    | 0       | ZK455.3     | 3e-17 | na      |
| SPU_001179  | 6    | 0       | ZC412.1     | 3e-04 | na      |
| SPU_001197  | 7    | 0       | Y40H4A.1b   | 5e-06 | gar-3   |
| SPU_001361  | 7    | 0       | AC7.1b      | 1e-17 | tag-49  |
| SPU_001418  | 7    | 0       | Y59H11AL.1b | 3e-16 | na      |
| SPU_001438  | 7    | 0       | C53C7.1b    | 2e-06 | na      |
| SPU_001485  | 7    | 0       | R106.2      | 2e-08 | na      |
| SPU_001486  | 7    | 0       | Y39A3B.5d   | 3e-09 | na      |
| SPU_001487  | 6    | 0       | Y39A3B.5d   | 2e-10 | na      |
| SPU_001490  | 7    | 0       | C25G6.5     | 2e-13 | na      |
| SPU_001503  | 7    | 0       | F47D12.1d   | 3e-12 | gar-2   |
| SPU_001504  | 7    | 0       | C09B7.1c    | 1e-14 | ser-7   |
| SPU_001567  | 7    | 0       | C25G6.5     | 3e-07 | na      |
| SPU_001625  | 7    | 2       | F14D12.6b   | 4e-10 | tag-24  |
| SPU_001626  | 7    | 3       | M03F4.3b    | 2e-15 | tag-126 |
| SPU_001627  | 5    | 2       | F14D12.6b   | 8e-16 | tag-24  |
| SPU_001674  | 7    | 0       | C09B7.1c    | 3e-15 | ser-7   |
| SPU_001675  | 7    | 2       | F31B9.1     | 3e-16 | na      |
| SPU_001678  | 6    | 0       | ZK455.3     | 5e-10 | na      |
| SPU_001687  | 7    | 0       | F14D12.6b   | 2e-07 | tag-24  |
| SPU_001688  | 7    | 0       | T23B3.4     | 7e-07 | na      |
| SPU_001760  | 7    | 0       | ZK455.3     | 1e-14 | na      |
| SPU_001839  | 6    | 0       | C52B11.3    | 6e-09 | dop-4   |
| SPU_001840  | 5    | 1       | C16D6.2     | 4e-07 | na      |
| SPU_001841  | 7    | 0       | F21C10.12   | 5e-08 | na      |

|            |   |    |             |       |         |
|------------|---|----|-------------|-------|---------|
| SPU_001842 | 6 | 0  | ZC412.1     | 4e-04 | na      |
| SPU_001843 | 6 | 0  | C16D6.2     | 2e-06 | na      |
| SPU_001844 | 6 | 0  | K02F2.6     | 2e-06 | ser-3   |
| SPU_001845 | 6 | 0  | C52B11.3    | 1e-06 | dop-4   |
| SPU_001964 | 7 | 0  | C09B7.1c    | 4e-12 | ser-7   |
| SPU_001965 | 7 | 0  | F15A8.5a    | 1e-12 | dop-1   |
| SPU_001966 | 7 | 0  | F15A8.5c    | 8e-14 | dop-1   |
| SPU_002099 | 7 | 0  | F16D3.7     | 0.001 | na      |
| SPU_002196 | 5 | 0  | C02D4.2f    | 3e-15 | ser-2   |
| SPU_002221 | 7 | 0  | ZK455.3     | 3e-10 | na      |
| SPU_002240 | 7 | 0  | M03F4.3b    | 4e-06 | tag-126 |
| SPU_002245 | 7 | 1  | F36D4.4     | 4e-06 | na      |
| SPU_002248 | 7 | 3  | K02F2.6     | 6e-08 | ser-3   |
| SPU_002311 | 7 | 0  | C25G6.5     | 3e-20 | na      |
| SPU_002312 | 7 | 11 | C25G6.5     | 2e-15 | na      |
| SPU_002403 | 6 | 1  | F59C12.2b   | 7e-14 | ser-1   |
| SPU_002419 | 6 | 1  | ZK455.3     | 5e-11 | na      |
| SPU_002422 | 7 | 0  | C50F7.1b    | 5e-17 | na      |
| SPU_002462 | 5 | 2  | C30F12.6    | 3e-18 | na      |
| SPU_002599 | 7 | 0  | K02F2.6     | 2e-16 | ser-3   |
| SPU_002823 | 7 | 1  | F15A8.5c    | 2e-18 | dop-1   |
| SPU_002845 | 7 | 0  | C09B7.1c    | 2e-07 | ser-7   |
| SPU_002967 | 7 | 0  | C52B11.3    | 3e-12 | dop-4   |
| SPU_003002 | 7 | 0  | C02D4.2e    | 2e-17 | ser-2   |
| SPU_003003 | 7 | 0  | C02D4.2e    | 2e-20 | ser-2   |
| SPU_003004 | 7 | 0  | C02D4.2f    | 4e-11 | ser-2   |
| SPU_003012 | 6 | 0  | Y40H4A.1a   | 6e-19 | gar-3   |
| SPU_003013 | 7 | 0  | C02D4.2f    | 4e-19 | ser-2   |
| SPU_003015 | 6 | 0  | Y40H4A.1a   | 7e-17 | gar-3   |
| SPU_003016 | 7 | 0  | M03F4.3b    | 2e-18 | tag-126 |
| SPU_003018 | 6 | 0  | C02D4.2f    | 3e-18 | ser-2   |
| SPU_003019 | 6 | 0  | C02D4.2e    | 9e-20 | ser-2   |
| SPU_003020 | 7 | 0  | Y40H4A.1a   | 2e-19 | gar-3   |
| SPU_003097 | 7 | 0  | C02D4.2f    | 2e-09 | ser-2   |
| SPU_003101 | 7 | 0  | ZK455.3     | 1e-13 | na      |
| SPU_003125 | 7 | 0  | Y59H11AL.1b | 2e-10 | na      |
| SPU_003336 | 6 | 0  | M03F4.3b    | 3e-10 | tag-126 |
| SPU_003342 | 6 | 1  | Y59H11AL.1b | 5e-07 | na      |
| SPU_003393 | 7 | 1  | F14D12.6b   | 4e-07 | tag-24  |
| SPU_003698 | 5 | 3  | C50F7.1b    | 1e-10 | na      |
| SPU_003808 | 7 | 0  | M03F4.3b    | 1e-12 | tag-126 |
| SPU_003875 | 5 | 0  | F14D12.6b   | 1e-18 | tag-24  |
| SPU_003948 | 7 | 1  | M01B2.7     | 0.001 | srsx-37 |
| SPU_003997 | 7 | 0  | F41E7.3     | 4e-14 | na      |
| SPU_004034 | 6 | 1  | C02D4.2f    | 4e-18 | ser-2   |
| SPU_004058 | 7 | 0  | C38C10.1    | 3e-12 | tkr-1   |
| SPU_004234 | 7 | 2  | F14D12.6a   | 2e-12 | tag-24  |
| SPU_004369 | 7 | 0  | F14D12.6b   | 4e-06 | tag-24  |
| SPU_004370 | 7 | 0  | F15A8.5a    | 9e-07 | dop-1   |
| SPU_004410 | 7 | 0  | F14D12.6b   | 2e-06 | tag-24  |
| SPU_004430 | 8 | 0  | T23B3.4     | 1e-09 | na      |

|            |   |   |             |       |         |
|------------|---|---|-------------|-------|---------|
| SPU_004460 | 7 | 0 | M03F4.3b    | 1e-15 | tag-126 |
| SPU_004568 | 5 | 1 | F47D12.1d   | 2e-08 | gar-2   |
| SPU_004569 | 5 | 0 | C09B7.1c    | 3e-11 | ser-7   |
| SPU_004571 | 5 | 0 | F14D12.6b   | 2e-13 | tag-24  |
| SPU_004572 | 7 | 0 | C25G6.5     | 4e-09 | na      |
| SPU_004573 | 5 | 0 | C30F12.6    | 5e-09 | na      |
| SPU_004574 | 7 | 1 | F47D12.1d   | 2e-14 | gar-2   |
| SPU_004576 | 7 | 0 | C09B7.1c    | 7e-13 | ser-7   |
| SPU_004577 | 7 | 0 | C09B7.1c    | 1e-11 | ser-7   |
| SPU_004579 | 7 | 0 | C09B7.1c    | 4e-14 | ser-7   |
| SPU_004580 | 7 | 0 | T14E8.3c    | 6e-10 | dop-3   |
| SPU_004581 | 7 | 0 | C09B7.1c    | 2e-12 | ser-7   |
| SPU_004727 | 7 | 1 | C02D4.2f    | 3e-09 | ser-2   |
| SPU_004728 | 6 | 1 | C02D4.2b    | 1e-16 | ser-2   |
| SPU_004729 | 7 | 1 | Y40H4A.1b   | 2e-12 | gar-3   |
| SPU_004730 | 6 | 1 | C02D4.2b    | 6e-20 | ser-2   |
| SPU_004752 | 7 | 0 | K02F2.6     | 2e-09 | ser-3   |
| SPU_004753 | 5 | 0 | C09B7.1c    | 1e-06 | ser-7   |
| SPU_004754 | 7 | 0 | C09B7.1c    | 1e-13 | ser-7   |
| SPU_004768 | 7 | 2 | M03F4.3b    | 1e-18 | tag-126 |
| SPU_004851 | 6 | 0 | C09B7.1c    | 3e-07 | ser-7   |
| SPU_004925 | 7 | 0 | C02D4.2e    | 5e-10 | ser-2   |
| SPU_005128 | 7 | 0 | F14D12.6b   | 4e-06 | tag-24  |
| SPU_005392 | 7 | 1 | ZK455.3     | 9e-12 | na      |
| SPU_005473 | 7 | 0 | C48C5.1     | 2e-11 | na      |
| SPU_005498 | 7 | 0 | Y40H4A.1b   | 1e-10 | gar-3   |
| SPU_005505 | 7 | 0 | F15A8.5c    | 4e-06 | dop-1   |
| SPU_005506 | 7 | 0 | F14D12.6b   | 2e-06 | tag-24  |
| SPU_005536 | 6 | 0 | T14E8.3c    | 2e-06 | dop-3   |
| SPU_005569 | 7 | 4 | Y39A3B.5d   | 2e-15 | na      |
| SPU_005595 | 7 | 0 | R106.2      | 8e-20 | na      |
| SPU_005608 | 7 | 0 | C53C7.1b    | 4e-05 | na      |
| SPU_005937 | 6 | 1 | Y59H11AL.1b | 1e-10 | na      |
| SPU_005981 | 7 | 0 | C09B7.1c    | 6e-07 | ser-7   |
| SPU_005985 | 7 | 0 | C09B7.1c    | 7e-08 | ser-7   |
| SPU_006046 | 5 | 0 | M03F4.3b    | 5e-08 | tag-126 |
| SPU_006179 | 7 | 0 | C39E6.6     | 1e-06 | npr-1   |
| SPU_006182 | 7 | 0 | F14D12.6b   | 6e-10 | tag-24  |
| SPU_006249 | 7 | 0 | F15A8.5c    | 4e-11 | dop-1   |
| SPU_006250 | 5 | 1 | C53C7.1b    | 4e-10 | na      |
| SPU_006251 | 7 | 0 | F15A8.5c    | 6e-11 | dop-1   |
| SPU_006252 | 7 | 0 | K02F2.6     | 1e-09 | ser-3   |
| SPU_006253 | 7 | 0 | F15A8.5c    | 2e-08 | dop-1   |
| SPU_006309 | 7 | 0 | T05A1.1b    | 1e-04 | npr-2   |
| SPU_006316 | 7 | 0 | T27D1.3     | 4e-12 | na      |
| SPU_006356 | 6 | 4 | T05A1.1b    | 3e-07 | npr-2   |
| SPU_006357 | 6 | 2 | M03F4.3b    | 7e-12 | tag-126 |
| SPU_006360 | 6 | 1 | F47D12.1d   | 3e-19 | gar-2   |
| SPU_006431 | 7 | 0 | K02F2.6     | 1e-16 | ser-3   |
| SPU_006448 | 7 | 0 | C02D4.2f    | 2e-20 | ser-2   |
| SPU_006559 | 7 | 1 | M03F4.3b    | 3e-10 | tag-126 |

|            |   |   |             |       |         |
|------------|---|---|-------------|-------|---------|
| SPU_006575 | 7 | 0 | C52B11.3    | 4e-08 | dop-4   |
| SPU_006593 | 7 | 0 | F15A8.5c    | 9e-08 | dop-1   |
| SPU_006594 | 7 | 0 | C09B7.1c    | 2e-06 | ser-7   |
| SPU_006697 | 6 | 0 | T05A1.1a    | 1e-04 | npr-2   |
| SPU_006737 | 7 | 0 | T05A1.1b    | 4e-19 | npr-2   |
| SPU_006819 | 7 | 0 | C09B7.1c    | 2e-14 | ser-7   |
| SPU_006820 | 5 | 0 | ZK455.3     | 4e-14 | na      |
| SPU_006821 | 7 | 0 | ZK455.3     | 2e-17 | na      |
| SPU_006822 | 7 | 0 | ZK455.3     | 6e-18 | na      |
| SPU_006834 | 7 | 0 | C30F12.6    | 2e-13 | na      |
| SPU_006904 | 7 | 1 | C53C7.1b    | 1e-10 | na      |
| SPU_006918 | 5 | 1 | Y40H4A.1a   | 4e-14 | gar-3   |
| SPU_006920 | 6 | 0 | C02D4.2f    | 2e-17 | ser-2   |
| SPU_007061 | 7 | 0 | Y59H11AL.1b | 2e-06 | na      |
| SPU_007062 | 7 | 0 | T14E8.3d    | 5e-11 | dop-3   |
| SPU_007063 | 7 | 0 | T14E8.3d    | 4e-06 | dop-3   |
| SPU_007064 | 7 | 0 | C09B7.1c    | 2e-07 | ser-7   |
| SPU_007090 | 7 | 0 | Y39A3B.5d   | 9e-11 | na      |
| SPU_007094 | 8 | 4 | ZK455.3     | 1e-16 | na      |
| SPU_007162 | 8 | 1 | ZK455.3     | 2e-19 | na      |
| SPU_007199 | 7 | 3 | C50F7.1b    | 4e-20 | na      |
| SPU_007274 | 7 | 0 | F02E8.2b    | 1e-13 | na      |
| SPU_007359 | 7 | 3 | K02F2.6     | 8e-17 | ser-3   |
| SPU_007367 | 6 | 0 | F14D12.6b   | 2e-04 | tag-24  |
| SPU_007396 | 7 | 0 | F15A8.5c    | 5e-13 | dop-1   |
| SPU_007399 | 6 | 1 | C02D4.2f    | 8e-14 | ser-2   |
| SPU_007415 | 7 | 2 | F59C12.2b   | 4e-12 | ser-1   |
| SPU_007420 | 5 | 3 | C39E6.6     | 5e-15 | npr-1   |
| SPU_007432 | 7 | 0 | F15A8.5c    | 2e-13 | dop-1   |
| SPU_007453 | 7 | 3 | C25G6.5     | 0.001 | na      |
| SPU_007465 | 7 | 1 | F56B6.5     | 3e-11 | na      |
| SPU_007467 | 7 | 0 | M03F4.3b    | 5e-15 | tag-126 |
| SPU_007490 | 7 | 0 | ZK455.3     | 1e-08 | na      |
| SPU_007491 | 7 | 0 | ZK455.3     | 1e-11 | na      |
| SPU_007574 | 7 | 0 | K10B4.4     | 1e-14 | na      |
| SPU_007575 | 7 | 0 | K02F2.6     | 2e-16 | ser-3   |
| SPU_007625 | 7 | 0 | C48C5.1     | 2e-16 | na      |
| SPU_007640 | 5 | 1 | C25G6.5     | 6e-09 | na      |
| SPU_007642 | 7 | 0 | C30F12.6    | 1e-15 | na      |
| SPU_007646 | 8 | 0 | Y59H11AL.1b | 2e-13 | na      |
| SPU_007707 | 7 | 0 | F41E7.3     | 3e-07 | na      |
| SPU_007761 | 7 | 0 | F02E8.2b    | 1e-09 | na      |
| SPU_007794 | 6 | 3 | C16D6.2     | 1e-08 | na      |
| SPU_007795 | 7 | 1 | C09B7.1c    | 1e-11 | ser-7   |
| SPU_007796 | 7 | 1 | C09B7.1c    | 6e-11 | ser-7   |
| SPU_007806 | 7 | 1 | C02D4.2e    | 3e-15 | ser-2   |
| SPU_007807 | 7 | 1 | ZK455.3     | 2e-13 | na      |
| SPU_007816 | 5 | 1 | Y40H4A.1a   | 3e-15 | gar-3   |
| SPU_007917 | 5 | 0 | C30F12.6    | 7e-09 | na      |
| SPU_008003 | 7 | 0 | W05B5.2     | 6e-16 | na      |
| SPU_008106 | 6 | 0 | F14D12.6a   | 4e-17 | tag-24  |

|            |   |   |             |       |         |
|------------|---|---|-------------|-------|---------|
| SPU_008124 | 7 | 1 | F41E7.3     | 0.002 | na      |
| SPU_008127 | 7 | 0 | F16D3.7     | 0.001 | na      |
| SPU_008205 | 7 | 0 | F41E7.3     | 2e-19 | na      |
| SPU_008226 | 7 | 0 | ZK455.3     | 2e-14 | na      |
| SPU_008236 | 6 | 4 | C54A12.2    | 5e-08 | na      |
| SPU_008245 | 7 | 0 | K09G1.4a    | 3e-08 | dop-2   |
| SPU_008269 | 6 | 0 | F36D4.4     | 4e-05 | na      |
| SPU_008476 | 8 | 0 | AC7.1b      | 2e-18 | tag-49  |
| SPU_008509 | 7 | 0 | R106.2      | 3e-11 | na      |
| SPU_008564 | 8 | 0 | AC7.1b      | 1e-19 | tag-49  |
| SPU_008711 | 6 | 1 | K09G1.4b    | 9e-06 | dop-2   |
| SPU_008790 | 7 | 0 | ZK455.3     | 3e-18 | na      |
| SPU_008814 | 7 | 0 | C50F7.1b    | 2e-07 | na      |
| SPU_008884 | 7 | 0 | C30F12.6    | 3e-13 | na      |
| SPU_008921 | 7 | 0 | F14D12.6b   | 2e-18 | tag-24  |
| SPU_008941 | 7 | 1 | Y40H4A.1b   | 3e-11 | gar-3   |
| SPU_008955 | 7 | 0 | C06G4.5     | 2e-07 | na      |
| SPU_009038 | 7 | 0 | Y59H11AL.1b | 9e-17 | na      |
| SPU_009074 | 7 | 0 | F59C12.2b   | 5e-10 | ser-1   |
| SPU_009088 | 7 | 0 | C09B7.1c    | 6e-15 | ser-7   |
| SPU_009137 | 7 | 0 | C03G6.16    | 8e-07 | srsx-24 |
| SPU_009157 | 7 | 1 | Y59H11AL.1b | 5e-09 | na      |
| SPU_009200 | 5 | 2 | Y54G2A.35   | 3e-08 | na      |
| SPU_009202 | 7 | 0 | T14E8.3d    | 8e-13 | dop-3   |
| SPU_009211 | 7 | 0 | C10C6.2     | 2e-06 | npr-3   |
| SPU_009291 | 7 | 0 | C03G6.16    | 6e-07 | srsx-24 |
| SPU_009538 | 7 | 0 | Y40H4A.1a   | 7e-09 | gar-3   |
| SPU_009550 | 7 | 0 | T23C6.5     | 6e-08 | na      |
| SPU_009580 | 7 | 0 | M03F4.3b    | 7e-14 | tag-126 |
| SPU_009587 | 7 | 1 | F16D3.7     | 2e-12 | na      |
| SPU_009597 | 7 | 0 | C02D4.2e    | 7e-09 | ser-2   |
| SPU_009719 | 7 | 0 | F41E7.3     | 2e-12 | na      |
| SPU_009790 | 6 | 0 | Y40H4A.1b   | 4e-06 | gar-3   |
| SPU_009806 | 7 | 0 | Y39A3B.5d   | 4e-07 | na      |
| SPU_009880 | 5 | 2 | T05A1.1b    | 4e-09 | npr-2   |
| SPU_009893 | 5 | 0 | C53C7.1b    | 6e-11 | na      |
| SPU_009901 | 7 | 1 | ZK455.3     | 5e-16 | na      |
| SPU_009907 | 8 | 0 | K02F2.6     | 5e-10 | ser-3   |
| SPU_010179 | 7 | 0 | F02E8.2b    | 3e-18 | na      |
| SPU_010207 | 7 | 0 | ZK455.3     | 8e-20 | na      |
| SPU_010298 | 6 | 0 | F54D7.3     | 2e-15 | na      |
| SPU_010318 | 7 | 0 | T23B3.4     | 2e-11 | na      |
| SPU_010319 | 7 | 0 | T23B3.4     | 1e-09 | na      |
| SPU_010344 | 7 | 0 | Y54G2A.35   | 2e-05 | na      |
| SPU_010355 | 7 | 0 | F16D3.7     | 3e-04 | na      |
| SPU_010357 | 7 | 0 | F14D12.6b   | 1e-08 | tag-24  |
| SPU_010387 | 7 | 2 | Y40H4A.1b   | 5e-18 | gar-3   |
| SPU_010431 | 7 | 0 | C02D4.2e    | 2e-12 | ser-2   |
| SPU_010432 | 6 | 1 | na          | na    | na      |
| SPU_010433 | 7 | 1 | F56B6.5     | 5e-04 | na      |
| SPU_010454 | 6 | 0 | Y40H4A.1a   | 2e-20 | gar-3   |

|            |   |   |           |       |         |
|------------|---|---|-----------|-------|---------|
| SPU_010457 | 6 | 1 | C02D4.2e  | 1e-15 | ser-2   |
| SPU_010657 | 6 | 1 | Y39A3B.5d | 1e-05 | na      |
| SPU_010794 | 7 | 2 | ZK455.3   | 2e-19 | na      |
| SPU_010795 | 7 | 0 | ZK455.3   | 1e-14 | na      |
| SPU_010798 | 7 | 0 | AC7.1b    | 3e-09 | tag-49  |
| SPU_010806 | 7 | 1 | C39E6.6   | 4e-13 | npr-1   |
| SPU_010836 | 7 | 0 | C30F12.6  | 1e-15 | na      |
| SPU_010845 | 7 | 0 | M03F4.3b  | 2e-13 | tag-126 |
| SPU_010880 | 7 | 0 | C09B7.1c  | 1e-14 | ser-7   |
| SPU_010882 | 7 | 0 | C25G6.5   | 1e-18 | na      |
| SPU_010883 | 7 | 0 | C30F12.6  | 9e-14 | na      |
| SPU_010884 | 6 | 1 | C30F12.6  | 1e-16 | na      |
| SPU_010887 | 7 | 2 | C09B7.1c  | 3e-09 | ser-7   |
| SPU_010912 | 7 | 0 | ZK455.3   | 2e-13 | na      |
| SPU_010930 | 5 | 1 | C30F12.6  | 2e-19 | na      |
| SPU_010988 | 6 | 1 | F47D12.1d | 2e-19 | gar-2   |
| SPU_010989 | 7 | 0 | T14E8.3c  | 5e-04 | dop-3   |
| SPU_011108 | 7 | 1 | C02D4.2f  | 1e-08 | ser-2   |
| SPU_011109 | 7 | 0 | F15A8.5c  | 9e-15 | dop-1   |
| SPU_011142 | 6 | 1 | C09B7.1c  | 1e-04 | ser-7   |
| SPU_011249 | 7 | 3 | F15A8.5b  | 1e-14 | dop-1   |
| SPU_011318 | 7 | 0 | C09B7.1c  | 2e-09 | ser-7   |
| SPU_011319 | 7 | 0 | ZK455.3   | 2e-07 | na      |
| SPU_011325 | 7 | 0 | F15A8.5c  | 9e-07 | dop-1   |
| SPU_011326 | 8 | 1 | F15A8.5c  | 1e-06 | dop-1   |
| SPU_011360 | 7 | 1 | W05B5.2   | 6e-16 | na      |
| SPU_011401 | 8 | 1 | F14D12.6a | 2e-18 | tag-24  |
| SPU_011411 | 7 | 0 | F47D12.1d | 1e-09 | gar-2   |
| SPU_011545 | 6 | 0 | K02F2.6   | 2e-06 | ser-3   |
| SPU_011556 | 6 | 0 | F01E11.5c | 2e-19 | tyra-2  |
| SPU_011557 | 6 | 0 | C02D4.2f  | 1e-16 | ser-2   |
| SPU_011591 | 6 | 0 | Y40H4A.1a | 2e-20 | gar-3   |
| SPU_011593 | 8 | 2 | C52B11.3  | 1e-17 | dop-4   |
| SPU_011600 | 7 | 0 | F14D12.6b | 1e-09 | tag-24  |
| SPU_011672 | 8 | 1 | K02F2.6   | 3e-12 | ser-3   |
| SPU_011674 | 7 | 0 | C50F7.1b  | 4e-12 | na      |
| SPU_011698 | 7 | 0 | K02F2.6   | 2e-14 | ser-3   |
| SPU_011719 | 7 | 0 | C49A9.7   | 4e-19 | na      |
| SPU_011807 | 7 | 0 | C48C5.1   | 3e-14 | na      |
| SPU_011831 | 6 | 0 | C49A9.7   | 1e-09 | na      |
| SPU_011924 | 7 | 0 | Y54E2A.1  | 2e-13 | na      |
| SPU_011948 | 7 | 0 | F14D12.6a | 4e-17 | tag-24  |
| SPU_012069 | 7 | 0 | M03F4.3b  | 9e-20 | tag-126 |
| SPU_012156 | 7 | 0 | F31B9.1   | 1e-19 | na      |
| SPU_012160 | 7 | 0 | C09B7.1c  | 1e-07 | ser-7   |
| SPU_012161 | 7 | 0 | T23C6.5   | 3e-07 | na      |
| SPU_012375 | 6 | 0 | T05A1.1b  | 2e-11 | npr-2   |
| SPU_012378 | 7 | 0 | C30F12.6  | 1e-14 | na      |
| SPU_012400 | 7 | 0 | C49A9.7   | 4e-19 | na      |
| SPU_012434 | 5 | 0 | K02F2.6   | 3e-09 | ser-3   |
| SPU_012435 | 7 | 0 | F14D12.6b | 4e-13 | tag-24  |

|            |   |   |             |       |         |
|------------|---|---|-------------|-------|---------|
| SPU_012436 | 7 | 0 | K02F2.6     | 8e-17 | ser-3   |
| SPU_012437 | 7 | 0 | T14E8.3c    | 7e-10 | dop-3   |
| SPU_012438 | 7 | 0 | C09B7.1c    | 1e-14 | ser-7   |
| SPU_012447 | 7 | 1 | C53C7.1b    | 6e-08 | na      |
| SPU_012525 | 7 | 0 | Y22D7AR.13  | 2e-20 | ser-4   |
| SPU_012562 | 5 | 4 | F15A8.5c    | 4e-14 | dop-1   |
| SPU_012629 | 7 | 0 | F47D12.1d   | 3e-19 | gar-2   |
| SPU_012689 | 7 | 2 | M03F4.3b    | 2e-17 | tag-126 |
| SPU_012714 | 7 | 1 | C25G6.5     | 9e-05 | na      |
| SPU_012723 | 6 | 0 | C50F7.1b    | 8e-15 | na      |
| SPU_012764 | 6 | 0 | C30F12.6    | 3e-14 | na      |
| SPU_012765 | 6 | 5 | K02F2.6     | 7e-14 | ser-3   |
| SPU_012974 | 7 | 1 | F15A8.5c    | 3e-10 | dop-1   |
| SPU_013018 | 7 | 0 | Y59H11AL.1b | 4e-10 | na      |
| SPU_013019 | 7 | 0 | ZK455.3     | 1e-16 | na      |
| SPU_013020 | 7 | 0 | C02D4.2f    | 2e-14 | ser-2   |
| SPU_013021 | 7 | 0 | ZK455.3     | 2e-08 | na      |
| SPU_013022 | 8 | 0 | ZK455.3     | 1e-15 | na      |
| SPU_013023 | 7 | 0 | ZK455.3     | 9e-09 | na      |
| SPU_013024 | 7 | 0 | ZK455.3     | 4e-14 | na      |
| SPU_013025 | 7 | 0 | ZK455.3     | 9e-17 | na      |
| SPU_013026 | 7 | 0 | F15A8.5c    | 8e-12 | dop-1   |
| SPU_013027 | 7 | 0 | ZK455.3     | 4e-17 | na      |
| SPU_013028 | 7 | 0 | M03F4.3b    | 9e-06 | tag-126 |
| SPU_013029 | 7 | 0 | ZK455.3     | 4e-14 | na      |
| SPU_013141 | 6 | 0 | W05B5.2     | 1e-16 | na      |
| SPU_013167 | 5 | 0 | F56B6.5     | 3e-16 | na      |
| SPU_013212 | 8 | 1 | C02D4.2f    | 5e-10 | ser-2   |
| SPU_013263 | 6 | 0 | C02D4.2e    | 6e-18 | ser-2   |
| SPU_013270 | 7 | 0 | F01E11.5c   | 1e-12 | tyra-2  |
| SPU_013306 | 7 | 0 | C09B7.1c    | 8e-14 | ser-7   |
| SPU_013374 | 5 | 3 | T22D1.12    | 1e-08 | na      |
| SPU_013503 | 7 | 2 | F14D12.6b   | 3e-17 | tag-24  |
| SPU_013554 | 7 | 0 | F15A8.5c    | 9e-06 | dop-1   |
| SPU_013555 | 7 | 0 | C30F12.6    | 1e-09 | na      |
| SPU_013556 | 7 | 0 | F15A8.5c    | 3e-05 | dop-1   |
| SPU_013595 | 7 | 0 | C09B7.1c    | 9e-13 | ser-7   |
| SPU_013623 | 6 | 0 | F15A8.5b    | 5e-18 | dop-1   |
| SPU_013657 | 7 | 0 | F01E11.5c   | 3e-12 | tyra-2  |
| SPU_013663 | 7 | 1 | F15A8.5c    | 2e-19 | dop-1   |
| SPU_013760 | 7 | 3 | F41E7.3     | 5e-19 | na      |
| SPU_013774 | 7 | 0 | F15A8.5c    | 2e-10 | dop-1   |
| SPU_013777 | 7 | 0 | Y39A3B.5d   | 3e-05 | na      |
| SPU_013779 | 6 | 0 | F16D3.7     | 2e-04 | na      |
| SPU_013780 | 7 | 0 | Y59H11AL.1b | 4e-06 | na      |
| SPU_013781 | 7 | 0 | Y40H4A.1a   | 2e-08 | gar-3   |
| SPU_013782 | 7 | 0 | Y39A3B.5d   | 4e-07 | na      |
| SPU_013783 | 6 | 0 | Y59H11AL.1b | 6e-05 | na      |
| SPU_013789 | 6 | 0 | C09B7.1c    | 2e-04 | ser-7   |
| SPU_013798 | 7 | 0 | F15A8.5c    | 3e-15 | dop-1   |
| SPU_013896 | 7 | 0 | C09B7.1c    | 2e-19 | ser-7   |

|            |   |   |            |       |        |
|------------|---|---|------------|-------|--------|
| SPU_013897 | 7 | 0 | C02D4.2f   | 3e-19 | ser-2  |
| SPU_013898 | 7 | 1 | C02D4.2e   | 5e-15 | ser-2  |
| SPU_013899 | 7 | 0 | C02D4.2e   | 3e-17 | ser-2  |
| SPU_013900 | 7 | 0 | C02D4.2e   | 2e-16 | ser-2  |
| SPU_013901 | 7 | 0 | C02D4.2e   | 2e-17 | ser-2  |
| SPU_013918 | 7 | 0 | ZK455.3    | 1e-17 | na     |
| SPU_013969 | 7 | 0 | Y39A3B.5d  | 7e-18 | na     |
| SPU_013985 | 6 | 1 | Y40H4A.1a  | 2e-15 | gar-3  |
| SPU_014098 | 7 | 0 | F02E8.2b   | 1e-08 | na     |
| SPU_014205 | 8 | 0 | ZK455.3    | 6e-19 | na     |
| SPU_014212 | 7 | 0 | C48C5.1    | 7e-18 | na     |
| SPU_014434 | 7 | 0 | C39E6.6    | 2e-13 | npr-1  |
| SPU_014447 | 7 | 2 | ZK455.3    | 5e-18 | na     |
| SPU_014448 | 7 | 2 | K10B4.4    | 2e-20 | na     |
| SPU_014487 | 7 | 2 | ZK455.3    | 3e-10 | na     |
| SPU_014499 | 6 | 0 | K02F2.6    | 3e-07 | ser-3  |
| SPU_014500 | 6 | 0 | F41E7.3    | 1e-07 | na     |
| SPU_014514 | 6 | 2 | T07D4.1    | 3e-10 | na     |
| SPU_014533 | 7 | 0 | F59C12.2b  | 1e-06 | ser-1  |
| SPU_014538 | 7 | 0 | ZK455.3    | 2e-16 | na     |
| SPU_014550 | 7 | 0 | T05A1.1b   | 5e-05 | npr-2  |
| SPU_014554 | 7 | 0 | C02D4.2f   | 2e-16 | ser-2  |
| SPU_014555 | 7 | 0 | Y22D7AR.13 | 5e-19 | ser-4  |
| SPU_014700 | 7 | 1 | C02D4.2f   | 4e-09 | ser-2  |
| SPU_014741 | 7 | 2 | T05A1.1b   | 2e-06 | npr-2  |
| SPU_014743 | 7 | 0 | F15A8.5c   | 4e-07 | dop-1  |
| SPU_014744 | 6 | 1 | F15A8.5c   | 8e-07 | dop-1  |
| SPU_014745 | 7 | 0 | F16D3.7    | 6e-08 | na     |
| SPU_014747 | 7 | 0 | F41E7.3    | 4e-13 | na     |
| SPU_014764 | 7 | 0 | F16D3.7    | 5e-07 | na     |
| SPU_014826 | 7 | 1 | ZK455.3    | 3e-13 | na     |
| SPU_014834 | 7 | 0 | C09B7.1c   | 3e-09 | ser-7  |
| SPU_014971 | 6 | 1 | K10B4.4    | 3e-14 | na     |
| SPU_014990 | 5 | 0 | Y40H4A.1b  | 7e-10 | gar-3  |
| SPU_014998 | 7 | 0 | F16D3.7    | 5e-06 | na     |
| SPU_015043 | 7 | 0 | F14D12.6b  | 5e-10 | tag-24 |
| SPU_015072 | 7 | 0 | F02E8.2b   | 4e-12 | na     |
| SPU_015073 | 7 | 0 | F02E8.2b   | 1e-18 | na     |
| SPU_015075 | 7 | 0 | F02E8.2b   | 5e-15 | na     |
| SPU_015076 | 7 | 0 | F02E8.2b   | 4e-16 | na     |
| SPU_015077 | 7 | 0 | F02E8.2b   | 8e-16 | na     |
| SPU_015078 | 7 | 1 | F02E8.2b   | 2e-13 | na     |
| SPU_015098 | 6 | 0 | C30F12.6   | 1e-16 | na     |
| SPU_015119 | 7 | 0 | AC7.1b     | 2e-19 | tag-49 |
| SPU_015129 | 7 | 0 | R106.2     | 2e-06 | na     |
| SPU_015130 | 7 | 0 | C01F1.4    | 4e-07 | na     |
| SPU_015131 | 7 | 0 | R106.2     | 1e-04 | na     |
| SPU_015186 | 7 | 0 | F59C12.2b  | 4e-09 | ser-1  |
| SPU_015217 | 7 | 3 | K02F2.6    | 2e-13 | ser-3  |
| SPU_015218 | 7 | 3 | Y54G2A.35  | 1e-09 | na     |
| SPU_015234 | 7 | 0 | AC7.1b     | 2e-12 | tag-49 |



|            |   |    |             |       |         |
|------------|---|----|-------------|-------|---------|
| SPU_015250 | 7 | 0  | Y54G2A.35   | 8e-11 | na      |
| SPU_015251 | 5 | 1  | T07D4.1     | 3e-07 | na      |
| SPU_015263 | 5 | 16 | Y40H4A.1a   | 3e-16 | gar-3   |
| SPU_015265 | 7 | 0  | C02D4.2f    | 2e-18 | ser-2   |
| SPU_015509 | 7 | 0  | T27D1.3     | 3e-11 | na      |
| SPU_015510 | 7 | 0  | R106.2      | 1e-11 | na      |
| SPU_015512 | 7 | 0  | F16D3.7     | 9e-09 | na      |
| SPU_015626 | 7 | 0  | C49A9.7     | 4e-17 | na      |
| SPU_015631 | 5 | 1  | F59C12.2b   | 4e-10 | ser-1   |
| SPU_015632 | 6 | 1  | C02D4.2b    | 2e-13 | ser-2   |
| SPU_015667 | 7 | 0  | C50F7.1b    | 1e-15 | na      |
| SPU_015757 | 7 | 0  | C30F12.6    | 1e-10 | na      |
| SPU_015779 | 7 | 1  | C02D4.2f    | 1e-16 | ser-2   |
| SPU_015780 | 7 | 1  | C02D4.2f    | 9e-16 | ser-2   |
| SPU_015788 | 7 | 6  | ZK455.3     | 6e-16 | na      |
| SPU_015847 | 7 | 0  | Y59H11AL.1b | 6e-13 | na      |
| SPU_015886 | 7 | 0  | F14D12.6b   | 5e-10 | tag-24  |
| SPU_015954 | 8 | 1  | T27D1.3     | 0.004 | na      |
| SPU_016148 | 7 | 0  | K10B4.4     | 2e-10 | na      |
| SPU_016400 | 7 | 0  | F41E7.3     | 2e-18 | na      |
| SPU_016513 | 6 | 1  | C02D4.2f    | 1e-19 | ser-2   |
| SPU_016534 | 7 | 5  | ZK455.3     | 1e-16 | na      |
| SPU_016597 | 7 | 0  | C10C6.2     | 9e-17 | npr-3   |
| SPU_016788 | 7 | 2  | Y40H4A.1b   | 2e-16 | gar-3   |
| SPU_016813 | 7 | 0  | T27D1.3     | 2e-10 | na      |
| SPU_016814 | 7 | 0  | T27D1.3     | 2e-11 | na      |
| SPU_016843 | 8 | 6  | M03F4.3b    | 2e-13 | tag-126 |
| SPU_016959 | 7 | 0  | AC7.1b      | 2e-14 | tag-49  |
| SPU_017045 | 7 | 1  | Y40H4A.1a   | 1e-14 | gar-3   |
| SPU_017091 | 7 | 0  | ZK455.3     | 2e-06 | na      |
| SPU_017092 | 7 | 0  | T14E8.3d    | 7e-11 | dop-3   |
| SPU_017093 | 7 | 0  | M03F4.3b    | 2e-06 | tag-126 |
| SPU_017094 | 6 | 1  | K09G1.4b    | 8e-05 | dop-2   |
| SPU_017095 | 7 | 0  | T14E8.3d    | 4e-08 | dop-3   |
| SPU_017096 | 5 | 4  | Y59H11AL.1b | 6e-14 | na      |
| SPU_017231 | 7 | 1  | C02D4.2f    | 2e-15 | ser-2   |
| SPU_017241 | 7 | 0  | Y39A3B.5d   | 6e-10 | na      |
| SPU_017269 | 7 | 2  | F14D12.6a   | 2e-17 | tag-24  |
| SPU_017371 | 7 | 2  | F15A8.5c    | 4e-16 | dop-1   |
| SPU_017429 | 7 | 0  | C25G6.5     | 7e-12 | na      |
| SPU_017443 | 6 | 1  | C02D4.2b    | 1e-19 | ser-2   |
| SPU_017655 | 5 | 1  | F14D12.6b   | 3e-04 | tag-24  |
| SPU_017687 | 7 | 0  | Y54E2A.1    | 3e-13 | na      |
| SPU_017688 | 7 | 0  | Y54E2A.1    | 2e-13 | na      |
| SPU_017689 | 5 | 1  | T14E8.3d    | 3e-12 | dop-3   |
| SPU_017763 | 7 | 0  | Y59H11AL.1b | 3e-12 | na      |
| SPU_017789 | 8 | 1  | C30F12.6    | 3e-16 | na      |
| SPU_017812 | 7 | 0  | T05A1.1b    | 1e-04 | npr-2   |
| SPU_017856 | 7 | 0  | C38C10.1    | 2e-11 | tkr-1   |
| SPU_017862 | 6 | 0  | F59C12.2b   | 1e-10 | ser-1   |
| SPU_017863 | 7 | 0  | T05A1.1a    | 7e-09 | npr-2   |

|            |   |    |             |       |        |
|------------|---|----|-------------|-------|--------|
| SPU_017864 | 6 | 0  | C53C7.1b    | 1e-11 | na     |
| SPU_017866 | 6 | 0  | F59C12.2b   | 3e-10 | ser-1  |
| SPU_017867 | 5 | 1  | Y39A3B.5d   | 7e-12 | na     |
| SPU_017885 | 7 | 1  | Y59H11AL.1b | 4e-14 | na     |
| SPU_017907 | 7 | 2  | C09B7.1c    | 1e-11 | ser-7  |
| SPU_017908 | 7 | 2  | C02D4.2f    | 9e-11 | ser-2  |
| SPU_017951 | 7 | 0  | Y40H4A.1a   | 2e-07 | gar-3  |
| SPU_017994 | 7 | 2  | F15A8.5a    | 2e-11 | dop-1  |
| SPU_018001 | 7 | 0  | C30F12.6    | 1e-19 | na     |
| SPU_018002 | 7 | 0  | C38C10.1    | 7e-18 | tkr-1  |
| SPU_018121 | 7 | 0  | C02D4.2f    | 2e-14 | ser-2  |
| SPU_018128 | 7 | 0  | C53C7.1b    | 1e-15 | na     |
| SPU_018227 | 7 | 0  | Y59H11AL.1b | 4e-14 | na     |
| SPU_018357 | 7 | 0  | F14D12.6b   | 7e-08 | tag-24 |
| SPU_018469 | 7 | 0  | F14D12.6b   | 5e-06 | tag-24 |
| SPU_018541 | 7 | 1  | C53C7.1b    | 6e-11 | na     |
| SPU_018600 | 7 | 0  | C09B7.1c    | 4e-14 | ser-7  |
| SPU_018603 | 7 | 0  | C38C10.1    | 5e-06 | tkr-1  |
| SPU_018604 | 7 | 0  | F47D12.1d   | 7e-20 | gar-2  |
| SPU_018799 | 7 | 0  | F41E7.3     | 3e-12 | na     |
| SPU_018947 | 7 | 0  | K10B4.4     | 9e-15 | na     |
| SPU_018997 | 7 | 0  | F57H12.4    | 8e-14 | na     |
| SPU_019013 | 7 | 0  | T22D1.12    | 0.003 | na     |
| SPU_019014 | 5 | 1  | Y40H4A.1b   | 4e-10 | gar-3  |
| SPU_019108 | 7 | 0  | F15A8.5c    | 5e-16 | dop-1  |
| SPU_019114 | 7 | 1  | C02D4.2f    | 4e-15 | ser-2  |
| SPU_019115 | 6 | 1  | C02D4.2b    | 1e-18 | ser-2  |
| SPU_019251 | 7 | 0  | Y59H11AL.1b | 1e-10 | na     |
| SPU_019252 | 7 | 0  | ZK455.3     | 1e-09 | na     |
| SPU_019362 | 5 | 0  | Y40H4A.1a   | 3e-17 | gar-3  |
| SPU_019375 | 7 | 0  | F54D7.3     | 1e-11 | na     |
| SPU_019376 | 7 | 0  | ZK455.3     | 2e-13 | na     |
| SPU_019596 | 7 | 0  | C39E6.6     | 1e-08 | npr-1  |
| SPU_019698 | 7 | 0  | F15A8.5c    | 1e-12 | dop-1  |
| SPU_019808 | 7 | 0  | T05A1.1b    | 6e-09 | npr-2  |
| SPU_019868 | 7 | 0  | Y40H4A.1b   | 6e-10 | gar-3  |
| SPU_019972 | 7 | 0  | Y58G8A.4b   | 7e-15 | na     |
| SPU_020028 | 7 | 1  | Y59H11AL.1b | 4e-17 | na     |
| SPU_020049 | 7 | 0  | C30F12.6    | 2e-08 | na     |
| SPU_020106 | 7 | 0  | F59C12.2b   | 2e-09 | ser-1  |
| SPU_020295 | 7 | 0  | ZK455.3     | 4e-14 | na     |
| SPU_020296 | 7 | 0  | C25G6.5     | 2e-11 | na     |
| SPU_020333 | 6 | 14 | F47D12.1d   | 2e-11 | gar-2  |
| SPU_020361 | 7 | 0  | F15A8.5c    | 2e-19 | dop-1  |
| SPU_020369 | 7 | 0  | C50F7.1b    | 3e-11 | na     |
| SPU_020410 | 6 | 10 | F31B9.1     | 1e-06 | na     |
| SPU_020415 | 7 | 0  | C16D6.2     | 3e-08 | na     |
| SPU_020416 | 6 | 0  | Y39A3B.5d   | 3e-11 | na     |
| SPU_020417 | 7 | 0  | Y39A3B.5d   | 1e-09 | na     |
| SPU_020418 | 6 | 0  | F59C12.2b   | 3e-12 | ser-1  |
| SPU_020557 | 7 | 2  | F01E11.5c   | 8e-12 | tyra-2 |

|            |   |    |           |       |         |
|------------|---|----|-----------|-------|---------|
| SPU_020587 | 6 | 0  | F02E8.2b  | 0.004 | na      |
| SPU_020593 | 6 | 1  | C02D4.2b  | 1e-17 | ser-2   |
| SPU_020594 | 6 | 1  | Y40H4A.1a | 2e-17 | gar-3   |
| SPU_020832 | 6 | 0  | C09B7.1c  | 1e-15 | ser-7   |
| SPU_020906 | 7 | 6  | W05B5.2   | 3e-10 | na      |
| SPU_020911 | 6 | 1  | F02E8.2b  | 3e-16 | na      |
| SPU_020934 | 7 | 0  | F59C12.2b | 1e-06 | ser-1   |
| SPU_020935 | 5 | 0  | C43C3.2   | 7e-06 | na      |
| SPU_021015 | 7 | 0  | M03F4.3b  | 2e-15 | tag-126 |
| SPU_021134 | 6 | 1  | C30F12.6  | 4e-12 | na      |
| SPU_021151 | 6 | 0  | F59C12.2b | 2e-11 | ser-1   |
| SPU_021160 | 7 | 0  | C50F7.1b  | 8e-19 | na      |
| SPU_021176 | 7 | 1  | C50F7.1b  | 6e-07 | na      |
| SPU_021187 | 6 | 0  | F59C12.2b | 6e-12 | ser-1   |
| SPU_021363 | 7 | 0  | C02D4.2e  | 2e-10 | ser-2   |
| SPU_021373 | 8 | 4  | F14D12.6a | 3e-16 | tag-24  |
| SPU_021390 | 7 | 2  | Y54G2A.35 | 1e-09 | na      |
| SPU_021507 | 6 | 0  | T02E9.1   | 2e-10 | na      |
| SPU_021574 | 6 | 0  | C09B7.1c  | 9e-06 | ser-7   |
| SPU_021575 | 7 | 0  | C39E6.6   | 1e-04 | npr-1   |
| SPU_021578 | 6 | 0  | T19F4.1b  | 9e-04 | na      |
| SPU_021579 | 7 | 0  | F15A8.5c  | 2e-14 | dop-1   |
| SPU_021613 | 7 | 0  | Y54E2A.1  | 4e-15 | na      |
| SPU_021683 | 7 | 0  | C48C5.1   | 2e-12 | na      |
| SPU_021776 | 7 | 3  | F14D12.6a | 1e-10 | tag-24  |
| SPU_021998 | 7 | 0  | F15A8.5b  | 5e-12 | dop-1   |
| SPU_022112 | 6 | 10 | C09B7.1c  | 2e-13 | ser-7   |
| SPU_022217 | 7 | 1  | C39E6.6   | 4e-06 | npr-1   |
| SPU_022220 | 5 | 1  | Y40H4A.1a | 9e-15 | gar-3   |
| SPU_022390 | 7 | 0  | F16D3.7   | 2e-04 | na      |
| SPU_022436 | 7 | 0  | C38C10.1  | 3e-12 | tkr-1   |
| SPU_022459 | 6 | 0  | T02E9.3   | 5e-09 | na      |
| SPU_022481 | 7 | 0  | Y39A3B.5d | 1e-10 | na      |
| SPU_022730 | 7 | 0  | C30F12.6  | 6e-13 | na      |
| SPU_022772 | 7 | 0  | ZK455.3   | 5e-10 | na      |
| SPU_022773 | 7 | 0  | C30F12.6  | 4e-13 | na      |
| SPU_022810 | 7 | 0  | C54A12.2  | 3e-06 | na      |
| SPU_022811 | 7 | 0  | C50F7.1b  | 7e-06 | na      |
| SPU_022883 | 6 | 0  | ZK455.3   | 8e-13 | na      |
| SPU_022932 | 7 | 2  | R106.2    | 7e-08 | na      |
| SPU_022962 | 7 | 0  | ZK455.3   | 1e-17 | na      |
| SPU_022966 | 6 | 0  | M03F4.3b  | 1e-04 | tag-126 |
| SPU_023017 | 5 | 1  | C02D4.2f  | 2e-10 | ser-2   |
| SPU_023047 | 7 | 0  | F15A8.5c  | 2e-06 | dop-1   |
| SPU_023135 | 6 | 1  | C09B7.1a  | 8e-06 | ser-7   |
| SPU_023251 | 8 | 1  | Y39A3B.5d | 8e-08 | na      |
| SPU_023252 | 7 | 0  | T02E9.3   | 1e-05 | na      |
| SPU_023253 | 7 | 0  | F14D12.6b | 2e-12 | tag-24  |
| SPU_023291 | 5 | 0  | M03F4.3b  | 5e-12 | tag-126 |
| SPU_023319 | 7 | 0  | F15A8.5c  | 8e-15 | dop-1   |
| SPU_023337 | 6 | 0  | C54A12.2  | 1e-08 | na      |

|            |   |    |             |       |         |
|------------|---|----|-------------|-------|---------|
| SPU_023340 | 6 | 0  | K02F2.6     | 6e-08 | ser-3   |
| SPU_023405 | 7 | 0  | M03F4.3b    | 1e-07 | tag-126 |
| SPU_023411 | 7 | 0  | C09B7.1c    | 2e-08 | ser-7   |
| SPU_023501 | 7 | 0  | C53C7.1b    | 1e-14 | na      |
| SPU_023573 | 7 | 0  | K02F2.6     | 1e-14 | ser-3   |
| SPU_023619 | 7 | 0  | ZK455.3     | 1e-17 | na      |
| SPU_023620 | 7 | 0  | ZK455.3     | 5e-11 | na      |
| SPU_023621 | 7 | 0  | ZK455.3     | 5e-18 | na      |
| SPU_023742 | 6 | 0  | C30F12.6    | 2e-16 | na      |
| SPU_023754 | 7 | 0  | K02F2.6     | 2e-15 | ser-3   |
| SPU_023755 | 5 | 1  | K02F2.6     | 4e-14 | ser-3   |
| SPU_024052 | 7 | 10 | F02E8.2a    | 6e-11 | na      |
| SPU_024053 | 7 | 0  | C24A8.1     | 5e-09 | na      |
| SPU_024079 | 6 | 0  | Y59H11AL.1b | 8e-17 | na      |
| SPU_024186 | 7 | 0  | F14D12.6b   | 2e-07 | tag-24  |
| SPU_024280 | 7 | 0  | Y39A3B.5d   | 1e-04 | na      |
| SPU_024300 | 7 | 0  | C30F12.6    | 3e-17 | na      |
| SPU_024410 | 7 | 1  | C02D4.2f    | 6e-18 | ser-2   |
| SPU_024563 | 5 | 1  | Y59H11AL.1b | 7e-06 | na      |
| SPU_024603 | 6 | 0  | F01E11.5c   | 6e-20 | tyra-2  |
| SPU_024655 | 7 | 2  | C53C7.1b    | 1e-13 | na      |
| SPU_024664 | 7 | 0  | F14D12.6b   | 2e-18 | tag-24  |
| SPU_024747 | 7 | 0  | C10C6.2     | 6e-14 | npr-3   |
| SPU_024811 | 7 | 1  | F15A8.5c    | 3e-15 | dop-1   |
| SPU_024812 | 7 | 1  | C48C5.1     | 6e-19 | na      |
| SPU_024813 | 7 | 0  | C53C7.1b    | 2e-19 | na      |
| SPU_024817 | 7 | 0  | F41E7.3     | 3e-14 | na      |
| SPU_024888 | 8 | 0  | ZK455.3     | 2e-18 | na      |
| SPU_024889 | 7 | 0  | Y59H11AL.1b | 2e-17 | na      |
| SPU_024962 | 8 | 0  | Y59H11AL.1b | 2e-18 | na      |
| SPU_024971 | 8 | 1  | C02D4.2f    | 1e-15 | ser-2   |
| SPU_025008 | 7 | 0  | T22D1.12    | 2e-04 | na      |
| SPU_025035 | 7 | 1  | F14D12.6a   | 4e-18 | tag-24  |
| SPU_025037 | 7 | 1  | C02D4.2f    | 2e-19 | ser-2   |
| SPU_025038 | 6 | 1  | C02D4.2f    | 2e-16 | ser-2   |
| SPU_025039 | 7 | 1  | C02D4.2f    | 3e-16 | ser-2   |
| SPU_025040 | 7 | 1  | Y40H4A.1b   | 6e-20 | gar-3   |
| SPU_025042 | 7 | 1  | C02D4.2f    | 5e-18 | ser-2   |
| SPU_025083 | 6 | 0  | F57C9.6     | 2e-05 | na      |
| SPU_025135 | 6 | 0  | ZK455.3     | 1e-14 | na      |
| SPU_025177 | 7 | 0  | F31B9.1     | 1e-08 | na      |
| SPU_025230 | 7 | 0  | F31B9.1     | 3e-09 | na      |
| SPU_025231 | 7 | 0  | K02F2.6     | 5e-08 | ser-3   |
| SPU_025232 | 7 | 0  | F31B9.1     | 7e-09 | na      |
| SPU_025233 | 7 | 0  | ZK455.3     | 3e-07 | na      |
| SPU_025314 | 7 | 0  | C56G3.1b    | 1e-14 | na      |
| SPU_025412 | 7 | 0  | C30F12.6    | 4e-13 | na      |
| SPU_025441 | 6 | 0  | C30F12.6    | 3e-17 | na      |
| SPU_025445 | 8 | 6  | C09B7.1c    | 1e-06 | ser-7   |
| SPU_025446 | 7 | 0  | F15A8.5a    | 1e-11 | dop-1   |
| SPU_025447 | 7 | 0  | Y54G2A.35   | 2e-11 | na      |

|            |   |   |             |       |         |
|------------|---|---|-------------|-------|---------|
| SPU_025448 | 7 | 0 | Y54G2A.35   | 8e-11 | na      |
| SPU_025453 | 7 | 0 | Y39A3B.5d   | 1e-15 | na      |
| SPU_025498 | 7 | 0 | C06G4.5     | 4e-10 | na      |
| SPU_025641 | 7 | 0 | C25G6.5     | 2e-08 | na      |
| SPU_025811 | 7 | 2 | C02D4.2f    | 1e-05 | ser-2   |
| SPU_025820 | 5 | 1 | F41E7.3     | 2e-19 | na      |
| SPU_025821 | 7 | 0 | C09B7.1c    | 4e-19 | ser-7   |
| SPU_025855 | 7 | 0 | F14D12.6b   | 2e-09 | tag-24  |
| SPU_025870 | 5 | 1 | C09B7.1c    | 4e-09 | ser-7   |
| SPU_025871 | 7 | 3 | F14D12.6b   | 9e-17 | tag-24  |
| SPU_025879 | 5 | 1 | M03F4.3b    | 5e-19 | tag-126 |
| SPU_025967 | 7 | 0 | F15A8.5c    | 8e-16 | dop-1   |
| SPU_026022 | 7 | 0 | M03F4.3b    | 1e-16 | tag-126 |
| SPU_026059 | 7 | 0 | C16D6.2     | 1e-13 | na      |
| SPU_026167 | 7 | 0 | T02E9.3     | 2e-13 | na      |
| SPU_026168 | 7 | 1 | K02F2.6     | 1e-14 | ser-3   |
| SPU_026175 | 6 | 0 | F56B6.5     | 4e-19 | na      |
| SPU_026316 | 7 | 0 | F59C12.2b   | 1e-09 | ser-1   |
| SPU_026345 | 6 | 1 | C02D4.2f    | 6e-12 | ser-2   |
| SPU_026363 | 7 | 0 | C15B12.5c   | 2e-18 | gar-1   |
| SPU_026368 | 8 | 0 | AC7.1a      | 5e-18 | tag-49  |
| SPU_026370 | 8 | 0 | Y59H11AL.1b | 6e-19 | na      |
| SPU_026413 | 7 | 0 | F15A8.5c    | 1e-14 | dop-1   |
| SPU_026414 | 7 | 1 | ZK455.3     | 3e-15 | na      |
| SPU_026453 | 8 | 1 | T27D1.3     | 1e-14 | na      |
| SPU_026584 | 7 | 0 | T07D4.1     | 1e-06 | na      |
| SPU_026585 | 7 | 0 | T07D4.1     | 1e-06 | na      |
| SPU_026729 | 7 | 0 | ZK455.3     | 4e-11 | na      |
| SPU_026730 | 7 | 0 | ZK455.3     | 2e-11 | na      |
| SPU_026769 | 7 | 0 | C52B11.3    | 1e-07 | dop-4   |
| SPU_026816 | 7 | 0 | C30F12.6    | 6e-15 | na      |
| SPU_026856 | 7 | 0 | C38C10.1    | 5e-17 | tkr-1   |
| SPU_027031 | 7 | 0 | AC7.1b      | 5e-17 | tag-49  |
| SPU_027116 | 6 | 1 | W05B5.2     | 3e-14 | na      |
| SPU_027177 | 7 | 0 | K02F2.6     | 9e-14 | ser-3   |
| SPU_027335 | 6 | 1 | F54D7.3     | 4e-14 | na      |
| SPU_027549 | 7 | 0 | K02F2.6     | 1e-11 | ser-3   |
| SPU_027550 | 7 | 1 | na          | na    | na      |
| SPU_027551 | 6 | 1 | na          | na    | na      |
| SPU_027584 | 7 | 0 | M03F4.3b    | 3e-20 | tag-126 |
| SPU_027633 | 6 | 4 | F54D7.3     | 1e-16 | na      |
| SPU_027634 | 6 | 5 | C02D4.2f    | 8e-19 | ser-2   |
| SPU_027704 | 6 | 1 | C50F7.1b    | 8e-15 | na      |
| SPU_027745 | 6 | 0 | F01E11.5c   | 1e-12 | tyra-2  |
| SPU_027866 | 7 | 0 | F41E7.3     | 6e-10 | na      |
| SPU_027908 | 7 | 0 | ZK455.3     | 3e-13 | na      |
| SPU_027943 | 5 | 1 | Y59H11AL.1b | 3e-05 | na      |
| SPU_027944 | 7 | 0 | C09B7.1c    | 3e-11 | ser-7   |
| SPU_028037 | 7 | 0 | Y39A3B.5d   | 3e-09 | na      |
| SPU_028056 | 7 | 0 | F41E7.3     | 2e-18 | na      |
| SPU_028063 | 7 | 2 | Y40H4A.1b   | 3e-15 | gar-3   |

|            |   |   |           |       |        |
|------------|---|---|-----------|-------|--------|
| SPU_028206 | 7 | 2 | C09B7.1c  | 6e-09 | ser-7  |
| SPU_028207 | 7 | 0 | F14F4.1   | 2e-17 | na     |
| SPU_028220 | 6 | 1 | C02D4.2f  | 1e-15 | ser-2  |
| SPU_028231 | 7 | 0 | K02F2.6   | 9e-17 | ser-3  |
| SPU_028335 | 6 | 0 | Y40H4A.1b | 1e-12 | gar-3  |
| SPU_028392 | 7 | 0 | C53C7.1b  | 5e-15 | na     |
| SPU_028498 | 5 | 0 | C09B7.1c  | 2e-09 | ser-7  |
| SPU_028517 | 5 | 2 | C09B7.1c  | 7e-10 | ser-7  |
| SPU_028617 | 7 | 0 | F14D12.6b | 1e-19 | tag-24 |
| SPU_028642 | 7 | 2 | F14D12.6a | 1e-12 | tag-24 |
| SPU_028643 | 6 | 2 | F14D12.6b | 2e-14 | tag-24 |
| SPU_028644 | 7 | 2 | C02D4.2f  | 1e-14 | ser-2  |
| SPU_028645 | 7 | 2 | F14D12.6b | 1e-14 | tag-24 |
| SPU_028822 | 7 | 0 | ZK455.3   | 5e-07 | na     |
| SPU_028823 | 7 | 0 | F59C12.2b | 2e-11 | ser-1  |
| SPU_028824 | 7 | 0 | C09B7.1c  | 2e-13 | ser-7  |
| SPU_028905 | 7 | 1 | F47D12.1d | 3e-09 | gar-2  |
