# Supplementary material
Source: PubMed Central journal article supplement (PMC1950334)
Supplement: NIHMS15618-supplement-03.pdf [file NIHMS15618-supplement-03.pdf]

Table S-7. Chemosensory genes identified by Motif/HMM search method. \* Sequences also found with the 7TM/PFAM/C.elegans search; \*\* ≥ 70% identical to motif-possessing sequence.

| Gene Number | Identification method |            |                           |          |            |          |          |          |
|-------------|-----------------------|------------|---------------------------|----------|------------|----------|----------|----------|
|             | LxxxxxxRxxAlxxPL      |            | Hidden Markov Model (HMM) |          |            |          |          |          |
|             | Motif                 | ≥70%**     | Fish OR                   |          | Lamprey OR |          | Fish T1R |          |
|             |                       |            | Bitscore                  | E-value  | Bitscore   | E-value  | Bitscore | E-value  |
| SPU_001503  |                       |            | 59                        | 4.80E-16 |            |          |          |          |
| SPU_001504  |                       |            | 68.1                      | 1.30E-18 |            |          |          |          |
| SPU_001531  | motif                 |            |                           |          |            |          |          |          |
| SPU_001536  | motif                 |            |                           |          |            |          |          |          |
| SPU_001537  | motif                 |            |                           |          |            |          |          |          |
| SPU_001914  |                       |            |                           |          | 49.6       | 5.50E-14 |          |          |
| SPU_001950  |                       | motif ≥70% |                           |          |            |          |          |          |
| SPU_001951  |                       | motif ≥70% |                           |          |            |          |          |          |
| SPU_001952  |                       | motif ≥70% |                           |          |            |          |          |          |
| SPU_002167  |                       |            |                           |          | 79.5       | 9.30E-23 |          |          |
| SPU_002419* | motif                 |            |                           |          |            |          |          |          |
| SPU_002599* |                       |            | 66                        | 5.10E-18 | 35.2       | 8.80E-10 |          |          |
| SPU_002875  |                       |            |                           |          | 87.4       | 4.70E-25 |          |          |
| SPU_003365  |                       |            | 45.2                      | 3.80E-12 |            |          |          |          |
| SPU_003875* |                       |            |                           |          | 90.2       | 6.90E-26 |          |          |
| SPU_004058* |                       |            | 55.4                      | 5.00E-15 |            |          |          |          |
| SPU_004569* |                       |            | 52                        | 4.50E-14 |            |          |          |          |
| SPU_004571* |                       |            | 68.6                      | 9.50E-19 |            |          |          |          |
| SPU_004573* |                       |            | 44.1                      | 7.80E-12 |            |          |          |          |
| SPU_004574* |                       |            | 63                        | 3.50E-17 |            |          |          |          |
| SPU_004576* |                       |            | 49.5                      | 2.30E-13 |            |          |          |          |
| SPU_004577* |                       |            | 48.2                      | 5.30E-13 |            |          |          |          |
| SPU_004578  |                       |            | 71.4                      | 1.50E-19 | 54.7       | 1.80E-15 |          |          |
| SPU_004579* |                       |            | 58.2                      | 8.10E-16 | 40.6       | 2.40E-11 |          |          |
| SPU_004629  | motif                 |            | 52.1                      | 4.20E-14 | 56.4       | 5.50E-16 |          |          |
| SPU_004752* |                       |            | 45.9                      | 2.50E-12 |            |          |          |          |
| SPU_004754* |                       |            | 52.3                      | 3.80E-14 |            |          |          |          |
| SPU_005086  |                       |            |                           |          | 64.5       | 2.30E-18 |          |          |
| SPU_005087  |                       |            |                           |          | 38.1       | 1.30E-10 |          |          |
| SPU_005097  |                       |            | 37                        | 7.80E-10 | 126.7      | 1.40E-36 |          |          |
| SPU_005578  | motif                 |            |                           |          |            |          |          |          |
| SPU_005678  |                       |            |                           |          | 44.3       | 1.90E-12 |          |          |
| SPU_005846  |                       |            |                           |          | 65.5       | 1.20E-18 |          |          |
| SPU_005967  | motif                 |            |                           |          | 120        | 1.30E-34 |          |          |
| SPU_006431* | motif                 |            |                           |          |            |          |          |          |
| SPU_006927  |                       |            |                           |          | 44.1       | 2.30E-12 |          |          |
| SPU_007186  |                       |            |                           |          |            |          | 64.5     | 9.40E-18 |
| SPU_007422  |                       |            | 44.9                      | 4.80E-12 |            |          |          |          |
| SPU_007467* |                       |            | 37.9                      | 4.30E-10 | 40.7       | 2.30E-11 |          |          |
| SPU_007574* |                       |            | 66.4                      | 4.00E-18 |            |          |          |          |
| SPU_007575* |                       |            | 68                        | 1.30E-18 |            |          |          |          |
| SPU_007646* | motif                 |            |                           |          |            |          |          |          |
| SPU_007747  |                       |            |                           |          |            |          | 181.6    | 6.20E-51 |
| SPU_007917  |                       |            | 51.2                      | 7.60E-14 |            |          |          |          |
| SPU_008190  |                       |            |                           |          | 35.3       | 8.30E-10 |          |          |
| SPU_008476* |                       | motif ≥70% |                           |          |            |          |          |          |
| SPU_008564* |                       | motif ≥70% |                           |          |            |          |          |          |
| SPU_008789  |                       |            |                           |          | 40.7       | 2.20E-11 |          |          |
| SPU_008947  |                       |            |                           |          | 86.7       | 7.40E-25 |          |          |
| SPU_008973  |                       |            |                           |          | 59         | 9.60E-17 |          |          |
| SPU_008988  |                       |            |                           |          |            |          | 159.4    | 3.10E-44 |
| SPU_009038* | motif                 |            |                           |          |            |          |          |          |
| SPU_009088* |                       |            | 53.3                      | 2.00E-14 |            |          |          |          |
| SPU_009149  |                       |            |                           |          | 59         | 9.40E-17 |          |          |
| SPU_009202* |                       |            | 43.3                      | 1.30E-11 |            |          |          |          |
| SPU_009393  |                       |            |                           |          |            |          | 106.6    | 1.80E-29 |
| SPU_009587* |                       |            | 70.5                      | 2.70E-19 |            |          |          |          |
| SPU_009766  |                       |            |                           |          | 201.3      | 2.00E-58 |          |          |
| SPU_010357* | motif                 |            |                           |          |            |          |          |          |
| SPU_010387* |                       |            |                           |          | 66.3       | 6.90E-19 |          |          |
| SPU_010431* |                       |            | 49.3                      | 2.70E-13 |            |          |          |          |

|             |       |  |      |          |       |          |       |          |
|-------------|-------|--|------|----------|-------|----------|-------|----------|
| SPU_010497  |       |  |      |          | 43.3  | 3.70E-12 |       |          |
| SPU_010836* | motif |  | 45.6 | 3.00E-12 |       |          |       |          |
| SPU_011320  |       |  |      |          | 173.1 | 3.70E-50 |       |          |
| SPU_011401* |       |  |      |          | 38.2  | 1.20E-10 |       |          |
| SPU_011405  |       |  |      |          | 67.9  | 2.40E-19 |       |          |
| SPU_011672* |       |  | 45.8 | 2.60E-12 |       |          |       |          |
| SPU_011698  | motif |  |      |          |       |          |       |          |
| SPU_011947  |       |  |      |          | 49.4  | 6.20E-14 |       |          |
| SPU_011948* |       |  |      |          | 41.6  | 1.20E-11 |       |          |
| SPU_012237  |       |  |      |          | 42.1  | 8.70E-12 |       |          |
| SPU_012273  |       |  |      |          | 54.9  | 1.60E-15 |       |          |
| SPU_012434* |       |  | 48.6 | 4.20E-13 |       |          |       |          |
| SPU_012435* |       |  | 61.3 | 1.10E-16 |       |          |       |          |
| SPU_012436* |       |  | 62.2 | 6.10E-17 |       |          |       |          |
| SPU_012438* |       |  | 57.4 | 1.40E-15 |       |          |       |          |
| SPU_012499  |       |  |      |          | 154   | 1.50E-44 |       |          |
| SPU_012525* |       |  | 53.6 | 1.60E-14 | 37.7  | 1.70E-10 |       |          |
| SPU_012562* |       |  |      |          | 35.9  | 5.60E-10 |       |          |
| SPU_012799  | motif |  |      |          |       |          |       |          |
| SPU_012974* |       |  | 42.7 | 1.90E-11 |       |          |       |          |
| SPU_012979  |       |  |      |          | 87.4  | 4.70E-25 |       |          |
| SPU_013107  |       |  |      |          | 201.3 | 2.00E-58 |       |          |
| SPU_013152  |       |  |      |          | 52.2  | 9.50E-15 |       |          |
| SPU_013306* |       |  | 63.5 | 2.60E-17 |       |          |       |          |
| SPU_013359  | motif |  | 58.2 | 8.20E-16 | 63.7  | 4.00E-18 |       |          |
| SPU_013453  |       |  |      |          | 56.2  | 6.50E-16 |       |          |
| SPU_013623* |       |  | 50.6 | 1.20E-13 | 37.1  | 2.50E-10 |       |          |
| SPU_013767  |       |  | 37   | 7.70E-10 | 123.8 | 1.00E-35 |       |          |
| SPU_014086  |       |  |      |          | 40.8  | 2.00E-11 |       |          |
| SPU_014269  |       |  |      |          | 104.7 | 3.80E-30 |       |          |
| SPU_014380  | motif |  |      |          |       |          |       |          |
| SPU_014447* | motif |  |      |          |       |          |       |          |
| SPU_014448* | motif |  |      |          |       |          |       |          |
| SPU_014487* | motif |  |      |          |       |          |       |          |
| SPU_015098* | motif |  |      |          |       |          |       |          |
| SPU_015139  | motif |  |      |          |       |          |       |          |
| SPU_015140  | motif |  |      |          |       |          |       |          |
| SPU_015259  |       |  |      |          | 40.6  | 2.30E-11 |       |          |
| SPU_015512* |       |  | 39   | 2.20E-10 |       |          |       |          |
| SPU_015593  |       |  |      |          | 42.5  | 6.50E-12 |       |          |
| SPU_015761  |       |  | 37   | 7.70E-10 | 123.8 | 1.00E-35 |       |          |
| SPU_015788* |       |  | 41   | 5.80E-11 |       |          |       |          |
| SPU_015847* |       |  | 54.6 | 8.40E-15 |       |          |       |          |
| SPU_015968  |       |  |      |          | 126.1 | 2.20E-36 |       |          |
| SPU_016177  |       |  |      |          | 55.8  | 8.10E-16 |       |          |
| SPU_016939  |       |  |      |          | 58.6  | 1.20E-16 |       |          |
| SPU_016940  |       |  |      |          | 55.6  | 9.60E-16 |       |          |
| SPU_016941  |       |  |      |          | 55.5  | 1.00E-15 |       |          |
| SPU_016942  |       |  |      |          | 39.4  | 5.30E-11 |       |          |
| SPU_017325  | motif |  |      |          |       |          |       |          |
| SPU_017426  |       |  |      |          |       |          | 57.3  | 9.80E-16 |
| SPU_017585  |       |  |      |          |       |          | 256.5 | 1.80E-73 |
| SPU_017687* |       |  | 53.6 | 1.60E-14 |       |          |       |          |
| SPU_017688* |       |  | 53.6 | 1.60E-14 |       |          |       |          |
| SPU_017789* |       |  | 50.4 | 1.30E-13 |       |          |       |          |
| SPU_017856* | motif |  |      |          |       |          |       |          |
| SPU_017918  |       |  | 48.9 | 3.30E-13 | 134.1 | 9.90E-39 |       |          |
| SPU_017919  |       |  | 37.1 | 7.40E-10 | 124.9 | 4.80E-36 |       |          |
| SPU_018006  |       |  | 39.9 | 1.20E-10 | 51.6  | 1.40E-14 |       |          |
| SPU_018091  |       |  |      |          | 89.5  | 1.10E-25 |       |          |
| SPU_018268  |       |  |      |          | 38.5  | 9.40E-11 |       |          |
| SPU_018339  | motif |  |      |          | 52.6  | 7.10E-15 |       |          |
| SPU_018478  |       |  |      |          |       |          | 40.3  | 5.30E-11 |
| SPU_018600* |       |  | 54.8 | 7.30E-15 | 40.6  | 2.40E-11 |       |          |
| SPU_018826  |       |  |      |          | 164.8 | 1.00E-47 |       |          |
| SPU_018966  |       |  |      |          | 42.3  | 7.30E-12 |       |          |
| SPU_019084  |       |  |      |          | 48.9  | 8.70E-14 |       |          |
| SPU_019108* |       |  | 49.3 | 2.60E-13 |       |          |       |          |
| SPU_019228  |       |  |      |          | 57.8  | 2.20E-16 |       |          |

|             |       |            |      |          |       |          |       |          |
|-------------|-------|------------|------|----------|-------|----------|-------|----------|
| SPU_019281  |       |            |      |          | 50.2  | 3.50E-14 |       |          |
| SPU_019376* | motif |            |      |          |       |          |       |          |
| SPU_019675  | motif |            |      |          |       |          |       |          |
| SPU_020028* |       |            | 39.7 | 1.40E-10 |       |          |       |          |
| SPU_020213  |       |            |      |          |       |          | 67.5  | 1.40E-18 |
| SPU_020348  |       |            |      |          | 39.9  | 3.80E-11 |       |          |
| SPU_020361* |       |            | 44.1 | 7.70E-12 | 63.8  | 3.60E-18 |       |          |
| SPU_021092  |       |            |      |          | 52    | 1.00E-14 |       |          |
| SPU_021160* | motif |            |      |          |       |          |       |          |
| SPU_021290  | motif |            |      |          |       |          |       |          |
| SPU_021588  |       |            | 46.6 | 1.50E-12 | 108.9 | 2.30E-31 |       |          |
| SPU_021794  |       |            |      |          | 49.1  | 7.80E-14 |       |          |
| SPU_022376  | motif |            |      |          |       |          |       |          |
| SPU_022401  |       |            |      |          | 37.4  | 2.00E-10 |       |          |
| SPU_022402  |       |            |      |          | 42.2  | 8.00E-12 |       |          |
| SPU_022403  |       |            |      |          | 39.8  | 3.90E-11 |       |          |
| SPU_022436* |       |            | 55.4 | 5.00E-15 |       |          |       |          |
| SPU_022459* | motif |            |      |          |       |          |       |          |
| SPU_022468  | motif |            |      |          |       |          |       |          |
| SPU_022683  |       |            | 49.4 | 2.50E-13 | 162.5 | 4.70E-47 |       |          |
| SPU_022684  |       |            |      |          | 159.6 | 3.30E-46 |       |          |
| SPU_022730* | motif |            | 37   | 8.00E-10 |       |          |       |          |
| SPU_022857  |       |            |      |          | 100.3 | 7.70E-29 |       |          |
| SPU_023223  | motif |            |      |          |       |          |       |          |
| SPU_023742* | motif |            |      |          |       |          |       |          |
| SPU_023754* |       |            | 59.1 | 4.60E-16 | 35.5  | 7.20E-10 |       |          |
| SPU_023755* |       |            | 47   | 1.20E-12 |       |          |       |          |
| SPU_024079* |       |            |      |          | 60.4  | 3.80E-17 |       |          |
| SPU_024749  |       |            | 38.5 | 3.00E-10 |       |          |       |          |
| SPU_024887  | motif |            |      |          |       |          |       |          |
| SPU_024889* |       | motif ≥70% |      |          |       |          |       |          |
| SPU_024900  |       |            | 51.7 | 5.50E-14 | 149.2 | 3.60E-43 |       |          |
| SPU_024924  |       |            |      |          | 42    | 9.20E-12 |       |          |
| SPU_024934  |       |            |      |          | 61.9  | 1.40E-17 |       |          |
| SPU_024992  |       |            |      |          | 35.1  | 9.40E-10 |       |          |
| SPU_025315  |       |            |      |          |       |          | 186.5 | 2.10E-52 |
| SPU_025412* | motif |            | 44.7 | 5.40E-12 |       |          |       |          |
| SPU_025436  |       |            |      |          | 117.6 | 6.60E-34 |       |          |
| SPU_025661  |       |            |      |          |       |          | 200.2 | 1.60E-56 |
| SPU_025999  |       |            |      |          |       |          | 163.4 | 1.80E-45 |
| SPU_026059* |       |            | 40.5 | 8.10E-11 |       |          |       |          |
| SPU_026167* | motif |            |      |          |       |          |       |          |
| SPU_026368* |       | motif ≥70% |      |          |       |          |       |          |
| SPU_026369  |       | motif ≥70% |      |          |       |          |       |          |
| SPU_026370  |       | motif ≥70% |      |          |       |          |       |          |
| SPU_026432  |       |            |      |          | 77.1  | 4.60E-22 |       |          |
| SPU_026530  |       |            |      |          |       |          | 193.5 | 1.70E-54 |
| SPU_026626  |       |            |      |          |       |          | 50.2  | 9.50E-14 |
| SPU_026627  |       |            |      |          |       |          | 151.1 | 6.50E-42 |
| SPU_026688  |       | motif ≥70% |      |          |       |          |       |          |
| SPU_026773  |       |            |      |          |       |          | 108.6 | 4.90E-30 |
| SPU_026853  |       |            |      |          | 36.5  | 3.80E-10 |       |          |
| SPU_027212  |       |            |      |          | 40.9  | 1.90E-11 |       |          |
| SPU_027549* |       |            | 50.6 | 1.10E-13 |       |          |       |          |
| SPU_027700  |       |            |      |          | 66.3  | 7.00E-19 |       |          |
| SPU_027867  |       |            |      |          | 37    | 2.70E-10 |       |          |
| SPU_027884  |       |            |      |          | 60.2  | 4.10E-17 |       |          |
| SPU_027908* | motif |            |      |          |       |          |       |          |
| SPU_028063* |       |            |      |          | 71.1  | 2.80E-20 |       |          |
| SPU_028231* |       |            | 60.3 | 2.00E-16 |       |          |       |          |
| SPU_028351  |       |            |      |          | 140.9 | 9.90E-41 |       |          |
| SPU_028801  |       |            |      |          | 37    | 2.70E-10 |       |          |
