# Supplementary material
Source: PubMed Central journal article supplement (PMC1950334)
Supplement: NIHMS15618-supplement-04.pdf [file NIHMS15618-supplement-04.pdf]

Table S-8 PCR primers used for analysis of retinal and placode gene expression

| Gene Name     | Primer Sequence       | Gene Name     | Primer Sequence               |
|---------------|-----------------------|---------------|-------------------------------|
| Ilet1 F       | GGTCCGAATGATTGACCAGT  | RH (27634) F2 | GAGCGGGGTTATCGTTGTAA          |
| Ilet1 R       | AGGGTGGAAAGCCACAGTATG | RH (27634) R2 | GGCCAACCCAGTTAACAGAA          |
| NeuroD F      | GGGTAAAAGCGAACACGAGA  | opsin4 F      | CAAGAAGCACAAAGTCGTCCA         |
| NeuroD R      | AATTCTTTGCCGAGGCGTAGA | opsin4 R      | TGGAATAAGGCATCCAGGAG          |
| Blimp1 F      | ACGAATGCAATGTCTGCAAG  | Pou4f1 F      | TTTACCGTCCAACCAAGACC          |
| Blimp1 R      | TGACAGCAATGTGGCTTCTC  | Pou4f1 R      | GTTGCGCCGAGTATTTCAAT          |
| Pax6 F        | CGGACTCTACCCGACAGAAG  | Sp-EBF3F      | GCCAGCTAGAACACGAAAGTG         |
| Pax6 R        | AGCTACCCGAGGCTTACTCC  | Sp-EBF3R      | TTGCAGCACCGTTGAAGATA          |
| Six3 F        | CCCCCTACCAAGAACCATTT  | Sp-DlxF       | AGCCGCCACAGGCACCAGAA          |
| Six3 R        | AAACCAGTTTTCCGACCTGTG | Sp-DlxR       | TCGCCGAAACACGGGAGGGA          |
| Rx F          | TACGACATCGGGTTACACCA  | Sp-Fox1F      | CGCCACCGTCGATAACCTG           |
| Rx R          | TTCCGACGATGCTTCTTCTT  | Sp-Fox1R      | ATTCTGCCATCCTGCTTTGC          |
| Ato2b F1      | CACCTGCGAGATCAAAGACA  | Sp-Pitx1AF    | CTGGCCCGTTATCGACTTTA          |
| Ato2b R1      | CCGACAGTTCTGGTGGATTT  | Sp-Pitx1AR    | TCCATCCATTCCGTTGTTATTAC       |
| Ato2b F2      | CCATGTGGACCTCTGACCTT  | Sp-Pitx1BF    | CACGAACAGCATAGCATCGC          |
| Ato2b R2      | TGTCTTTGATCTCGCAGGTG  | Sp-Pitx1BR    | TCAAGAGGGTCCGCTGAAAC          |
| Ato2b F3      | ACTGCAACGATACCCTGTCC  | Sp-Pitx2F     | CCTTACGGGTCACCGCCTGG          |
| Ato2b R3      | TGTTGATGATGACGGTGCTT  | Sp-Pitx2R     | TGAAAGCGTGGGGCTCTGGC          |
| Ato7 F1       | AAGCGACGTTTGAGCAAGAT  | Sp-Pitx3AF    | AGCAACGCACGGAACACCCA          |
| Ato7 R1       | ATGCCATTTTCGGAATCAAC  | Sp-Pitx3AR    | CTTCGCTTCTTACTATCGTCATCTTCGTC |
| Ato7 F2       | CCGAAATCTCGGTAACGTGT  | Sp-Eya1F      | ACCATAATCATCTTCCACTCACTGT     |
| Ato7 R2       | AGTCTATCCATCGCGTCGTT  | Sp-Eya1R      | CAAATCTTGTCCATTGTCATCG        |
| Ato (11315) F | CGACGACGATGTCTTTCTCA  | Sp-Pax1-9F    | AAGAAATGGTCAGATTACGC          |
| Ato (11315) R | GTGATTGATCGTGCATCAGG  | Sp-Pax1-9R    | GACCTTGTTACAGTCCTCA           |
| BarH1 F       | TTCGATGCAACGTCTCTTTG  | Sp-Pax2-5-8F  | CCAAAGGTGGTGTGCAAGAT          |
| BarH1 R       | AGATGGCTGACATGTTGCTG  | Sp-Pax2-5-8R  | AGACAACCCGTTTGATGCTC          |
| RH (05569) F  | CTCTTCGGGTGGAATCGTTA  | Sp-PaxAF      | ACATCGCCATTCGTACATCC          |
| RH (05569) R  | GAAAGGGATGACGAGAACCA  | Sp-PaxAR      | CTTCGTTCCCTCCTCTGACTT         |
| RH (06737) F  | ACCTCTTGGCCTCATCTCCT  | Sp-PaxBF      | AACAGGATATTGCGGAATAAGATTG     |
| RH (06737) R  | GTGTTTCTCGTCGCTGTTGA  | Sp-PaxBR      | GGGTTGCTGCGAGTTGTGAG          |
| RH (27634) F1 | GATGGCTCTTTGGGGATGTA  | Sp-Phox2BF    | TGTCACAAATGCTCGCCGTAT         |
| RH (27634) R1 | GCCGTTAGCTTTGGACGTAG  | Sp-Phox2BR    | CCTGGCTTCAGTTAGATCAGTCTTC     |
