# Supplementary material
Source: PubMed Central journal article supplement (PMC1950334)
Supplement: NIHMS15618-supplement-05.pdf [file NIHMS15618-supplement-05.pdf]

Table S-9 Circadian gene predictions

| <b>Gene name</b> | <b>Gene Number</b> | <b>Best BLAST Identity</b>                                             |
|------------------|--------------------|------------------------------------------------------------------------|
| Sp-Clock         | SPU_017407         | NM_004898 (Mouse)                                                      |
| Sp-CRY           | SPU_001597         | XM_422729 (Chick photolyase)                                           |
| Sp-Timeless1     | SPU_096239         | BC078023 (Xenopus Timeless)                                            |
| Sp-Timeless2     | SPU_025518         | AB208776 (Xenopus Tim)                                                 |
| Sp-Arnt          | SPU_000129         | NP_776418 (Bos taurus aryl hydrocarbon receptor nuclear translocator)  |
| Sp-Arnt-like     | SPU_022971         | NP_571749 (Danio rerio aryl hydrocarbon receptor nuclear translocator) |
| Sp-Arnt-like     | SPU_027935         | AAH41129 (Homo sapiens aryl hydrocarbon receptor nuclear translocator) |
