# Supplementary material
Source: PubMed Central journal article supplement (PMC1950334)
Supplement: NIHMS15618-supplement-09.pdf [file NIHMS15618-supplement-09.pdf]

Table S-1 Voltage Gated Ion Channel Gene predictions arranged by ion selectivity and type (Gutman et al. 2005)

|             |               |                     |               |            |             |             |             |
|-------------|---------------|---------------------|---------------|------------|-------------|-------------|-------------|
| <b>K+</b>   | <b>Kv1</b>    | <b>Kv3</b>          | <b>Kv4</b>    | <b>Kv7</b> | <b>Kv10</b> | <b>Kv11</b> | <b>Kv12</b> |
|             | SPU_026003    | SPU_019341          | SPU_012871    | SPU_004907 | SPU_000092  | SPU_016585  | SPU_010067  |
|             | SPU_006470    | SPU_009204          |               |            |             |             |             |
|             |               | SPU_006470          |               |            |             |             |             |
| <b>Ca++</b> | <b>L-type</b> | <b>N/P/Q/R-type</b> | <b>T-type</b> |            |             |             |             |
|             | SPU_007770    | SPU_011692          | SPU_017773    |            |             |             |             |
|             |               |                     | SPU_025833    |            |             |             |             |
| <b>Na+</b>  | SPU_025997    |                     |               |            |             |             |             |

|                     |
|---------------------|
| <b>Kv2 or8 or 9</b> |
| SPU_000856          |
|                     |
