# Supplementary material
Source: PubMed Central journal article supplement (PMC1950334)
Supplement: NIHMS15618-supplement-10.pdf [file NIHMS15618-supplement-10.pdf]

Table S-2 Gene predictions for proteins involved in synaptic vesicle release

| Gene Number              | Gene Name or Synonym    | Gene Characteristics    | Expression Data                            |
|--------------------------|-------------------------|-------------------------|--------------------------------------------|
| SPU_23951                | Sp-Sh3gl3, endophilin   | BAR domain              |                                            |
| SPU_07413                | Sp-Unc13, Munc13        | Rab effector            |                                            |
| SPU_03760                | Sp-RIM2                 | Rab effector            |                                            |
| SPU_14655                | Sp-Exoc1                | Exocyst complex         |                                            |
| SPU_28263                | Sp-Exoc2                | Exocyst complex         |                                            |
| SPU_04177                | Sp-Exoc3                | Exocyst complex         |                                            |
| SPU_01083 +<br>SPU_01084 | Sp-Exoc4                | Exocyst complex         |                                            |
| SPU_24725                | Sp-Exoc5                | Exocyst complex         |                                            |
| SPU_13045                | Sp-Exoc6                | Exocyst complex         |                                            |
| SPU_12639                | Sp-Exoc7                | Exocyst complex         |                                            |
| SPU_12639                | Sp-Exoc8                | Exocyst complex         |                                            |
| SPU_15335                | Sp-Vamp1, synaptobrevin | R-SNARE                 | egg, sperm                                 |
| SPU_04195                | Sp-Sec22 2              | R-SNARE                 |                                            |
| SPU_14365                | Sp-Sec22 1              | R-SNARE                 |                                            |
| SPU_12329                | Sp-Stx1                 | Qa-SNARE                | egg, sperm                                 |
| SPU_14243                | Sp-Stx5                 | Qa-SNARE                |                                            |
| SPU_01979                | Sp-Stx6                 | Qc-SNARE                |                                            |
| SPU_04249                | Sp-Stx8                 | Qc-SNARE                |                                            |
| SPU_18026                | Sp-Stx12                | SNARE                   |                                            |
| SPU_28884 +<br>SPU_28885 | Sp-Stx16                | Qa-SNARE                |                                            |
| SPU_12715                | Sp-Stx17                | SNARE                   |                                            |
| SPU_06176                | Sp-Stx18                | SNARE                   |                                            |
| SPU_04669                | Sp-Gosr2, membrin       | Qb-SNARE                |                                            |
| SPU_06886                | Sp-Bet1                 | Qc-SNARE                |                                            |
| SPU_21516                | Sp-Snap25               | Qb, Qc-SNARE            | egg, sperm                                 |
| SPU_13544                | Sp-Snap29               | Qc-SNARE                |                                            |
| SPU_06065                | Sp-Vti1                 | Qb-SNARE                |                                            |
| SPU_02552                | Sp-Stxbp1, Munc18       | SM, Stx binding protein | egg                                        |
| SPU_21816                | Sp-Nsf                  | AAA ATP'ase, chaperone  | egg                                        |
| SPU_19300                | Sp-Napa                 | NSF attachment protein  | egg                                        |
| SPU_12085                | Sp-Rab3                 | GTP'ase                 | egg                                        |
| SPU_05854                | Sp-Syt1-1, Syt-B, SynB  | Synaptotagmin           | egg; neural tissue in early pluteus, adult |
| SPU_02292                | Sp-Syt1-2               | Synaptotagmin           |                                            |
| SPU_23425                | Sp-Syt4                 | Synaptotagmin           |                                            |
| SPU_19995                | Sp-Syt5                 | Synaptotagmin           |                                            |
| SPU_07948                | Sp-Syt6-1               | Synaptotagmin           |                                            |
| SPU_19127                | Sp-Syt6-2               | Synaptotagmin           |                                            |
| SPU_20199                | Sp-Syt7                 | Synaptotagmin           |                                            |
| SPU_18035;<br>SPU_20349  | Sp-Syt9                 | Synaptotagmin           |                                            |
| SPU_12856                | Sp-Syt12                | Synaptotagmin           |                                            |
| SPU_01640                | Sp-Syt14                | Synaptotagmin           |                                            |
| SPU_16698                | Sp-Syt15-1-5'           | Synaptotagmin           |                                            |
| SPU_28132                | Sp-Syt15-1-3'           | Synaptotagmin           |                                            |
| SPU_22209                | Sp-Syt15-2              | Synaptotagmin           |                                            |
| SPU_01702                | Sp-17, B/K protein      | Synaptotagmin           |                                            |
