# Supplementary material
Source: PubMed Central journal article supplement (PMC1950334)
Supplement: NIHMS15618-supplement-11.pdf [file NIHMS15618-supplement-11.pdf]

Table S-3 Gene predictions for neurotransmitters, transporters and receptors

| Gene Number                  | Gene Name or Synonym | Gene Characteristics                      |
|------------------------------|----------------------|-------------------------------------------|
| <b>Serotonin pathway</b>     |                      |                                           |
| SPU_003725                   | Sp-TPH               | tryptophan 5-hydroxylase                  |
| SPU_021931                   | Sp-AADC              | aromatic amino acid decarboxylase         |
| SPU_022382                   | Sp-SERT              | serotonin transporter                     |
| SPU_018826                   | Sp-5HT1A             | serotonin receptor 1A                     |
| SPU_017918                   | Sp-5HT1F             | serotonin receptor 1F                     |
| SPU_025436                   | Sp-5HT2C             | serotonin receptor 2C                     |
| SPU_005097                   | Sp-5HT7              | serotonin receptor 7                      |
| <b>Dopamine pathway</b>      |                      |                                           |
| SPU_000836                   | Sp-TH                | tyrosine hydroxylase                      |
| SPU_021931                   | Sp-AADC              | aromatic amino acid decarboxylase         |
| SPU_011320                   | Sp-DRD1              | dopamine receptor D1                      |
| SPU_028351                   | Sp-DRD1              | dopamine receptor D1                      |
| SPU_022683                   | Sp-DRD1              | dopamine receptor D1                      |
| SPU_022684                   | Sp-DRD1              | dopamine receptor D1                      |
| SPU_023252                   | Sp-DRD2              | dopamine receptor D2                      |
| SPU_024900                   | Sp-DRD2              | dopamine receptor D2                      |
| <b>Adrenaline pathway</b>    |                      |                                           |
| SPU_022703                   | Sp-DBH               | dopamine $\beta$ -hydroxylase             |
| SPU_008370                   | Sp-DBH               | dopamine $\beta$ -hydroxylase             |
| SPU_022506                   | Sp-SLC6A2            | noradrenaline transporter                 |
| SPU_000971                   | Sp-SLC6A2            | noradrenaline transporter                 |
| SPU_021588                   | Sp-ADR1A             | adrenaline receptor 1A                    |
| <b>GABA pathway</b>          |                      |                                           |
| SPU_002857                   | Sp-GAD               | glutamic acid decarboxylase               |
| SPU_006561                   | Sp-GAT               | GABA transporter                          |
| SPU_001698                   | Sp-GAT               | GABA transporter                          |
| SPU_000076                   | Sp-GAT               | GABA transporter                          |
| SPU_003711                   | Sp-GAT               | GABA transporter                          |
| SPU_028560                   | Sp-GABRA             | GABA receptor A (N-terminus)              |
| SPU_025266                   |                      | GABA receptor A (C-terminus)              |
| <b>Acetylcholine pathway</b> |                      |                                           |
| SPU_024249                   | Sp-ChAT              | choline acetyltransferase                 |
| SPU_006123                   | Sp-AChE              | acetylcholinesterase                      |
| SPU_000154                   | Sp-AChE              | acetylcholinesterase (missing N-terminus) |
| SPU_002589                   | Sp-AChE              | acetylcholinesterase                      |
| SPU_004183                   | Sp-AChE              | acetylcholinesterase                      |
| SPU_002605                   | Sp-AChE              | acetylcholinesterase                      |
| SPU_020107                   | Sp-AChE              | acetylcholinesterase (missing N-terminus) |
| SPU_019203                   | Sp-AChE              | acetylcholinesterase                      |
| SPU_022763                   | Sp-AChE              | acetylcholinesterase                      |
| SPU_012184                   | Sp-AChE              | acetylcholinesterase (missing N-terminus) |
| SPU_006161                   | Sp-VACHT             | vesicular acetylcholine transporter       |
| SPU_019709                   | Sp-nAChR alpha2      | cholinergic receptor, nicotinic, alpha 2  |
| SPU_001774                   | Sp-nAChR alpha2      | cholinergic receptor, nicotinic, alpha 2  |
| SPU_002737                   | Sp-nAChR alpha2      | cholinergic receptor, nicotinic, alpha 2  |
| SPU_023216                   | Sp-nAChR alpha3      | cholinergic receptor, nicotinic, alpha 3  |
| SPU_018204                   | Sp-nAChR alpha3      | cholinergic receptor, nicotinic, alpha 3  |
| SPU_019711                   | Sp-nAChR alpha4      | cholinergic receptor, nicotinic, alpha 4  |
| SPU_019710                   | Sp-nAChR alpha4      | cholinergic receptor, nicotinic, alpha 4  |
| SPU_021159                   | Sp-nAChR alpha6      | cholinergic receptor, nicotinic, alpha 6  |
| SPU_013095                   | Sp-nAChR alpha7      | cholinergic receptor, nicotinic, alpha 7  |
| SPU_005670                   | Sp-nAChR alpha9      | cholinergic receptor, nicotinic, alpha 9  |
| SPU_021158                   | Sp-nAChR alpha10     | cholinergic receptor, nicotinic, alpha 10 |
| SPU_012979                   | Sp-mAChR M3          | cholinergic receptor, muscarinic, M3      |
| SPU_002875                   | Sp-mAChR M3          | cholinergic receptor, muscarinic, M3      |
| SPU_019228                   | Sp-mAChR M4          | cholinergic receptor, muscarinic, M4      |
| SPU_016177                   | Sp-mAChR M5          | cholinergic receptor, muscarinic, M5      |
| <b>Histamine pathway</b>     |                      |                                           |
| SPU_010021                   | Sp-HDC               | histidine decarboxylase                   |
| SPU_000288                   | Sp-HDC               | histidine decarboxylase                   |
| SPU_022857                   | Sp-HRH1              | histamine receptor H1                     |
| SPU_009766                   | Sp-HRH2              | histamine receptor H2                     |
| SPU_013107                   | Sp-HRH2              | histamine receptor H2                     |
| <b>Glycine pathway</b>       |                      |                                           |
| SPU_017211                   | Sp-GlyRA1            | glycine receptor alpha1                   |
| SPU_023734                   | Sp-GlyRA2            | glycine receptor alpha2                   |
