# Supplementary material
Source: PubMed Central journal article supplement (PMC1950334)
Supplement: NIHMS15618-supplement-12.pdf [file NIHMS15618-supplement-12.pdf]

Table S-4 Gene predictions for nitric oxide signaling

| <b>Nitric Oxide Synthase (NOS)</b>             |                                                                                                                        |
|------------------------------------------------|------------------------------------------------------------------------------------------------------------------------|
| NOS                                            | SPU_002328                                                                                                             |
| NOS-like                                       | SPU_013373, SPU_016283, SPU_025118, SPU_019970                                                                         |
| <b>Soluble Guanylyl Cyclase (SGC) subunits</b> |                                                                                                                        |
| SGC- $\alpha$                                  | SPU_0000116                                                                                                            |
| SGC- $\beta$ 1                                 | SPU_000117, SPU_005870                                                                                                 |
| SGC- $\beta$ 2                                 | SPU_002686                                                                                                             |
| SGC subunit-like                               | SPU_021967, SPU_000090, SPU_021465, SPU_005984, SPU_028870, SPU_022752, SPU_016988, SPU_004985, SPU_015575, SPU_015674 |
