# Supplementary material
Source: PubMed Central journal article supplement (PMC1950334)
Supplement: NIHMS15618-supplement-13.pdf [file NIHMS15618-supplement-13.pdf]

Table S-5 Gene predictions for Growth Factors and Growth Factor receptors

| <b>Gene Name</b>                       | <b>Gene Number</b>                                   |
|----------------------------------------|------------------------------------------------------|
| <b>Insulin</b>                         |                                                      |
| Sp-IGF 1                               | SPU_007203                                           |
| Sp-IGF 2                               | SPU_030139                                           |
| Sp-Furin-1 (Furin-like protease)       | SPU_010722                                           |
| Insulin Receptor                       | SPU_019695<br>SPU_003915<br>SPU_003916<br>SPU_002840 |
| Insulin Binding Protein                | SPU_001676                                           |
| <b>Neurotrophins and Trk receptors</b> |                                                      |
| Trk Receptor                           | SPU_020803                                           |
| Neurotrophin                           | SPU_030073                                           |
| <b>Ependymins</b>                      |                                                      |
| Ependymin related protein              | SPU_020738<br>SPU_000148                             |
| <b>Endocrine</b>                       |                                                      |
| estrogens                              | SPU_028422,<br>SPU_014405                            |
| androgens                              | SPU_021192                                           |
| glucocorticoids                        | SPU_012586                                           |
| retinoic acid                          | SPU_012586                                           |
| steroid receptors                      | SPU_008117                                           |
| <b>Thyroidal</b>                       |                                                      |
| sodium iodide transporter              | SPU_021781                                           |
| thyroid peroxidase                     | SPU_013889                                           |
| thyroglobulin                          | SPU_011634                                           |
| thyroid hormone receptors              | SPU_025239,<br>SPU_018861                            |
